# Supplementary material for: Human-in-the-Loop Optimization of Transcranial Electrical Stimulation at the Point of Care: A Computational Perspective
Source: MDPI journal article supplement (doi:10.3390/brainsci12101294), 2022-09-26
Supplement: s1 [file s1]

## Supplementary Materials: Human-in-the-loop optimization for model predictive control of tES evoked HbT

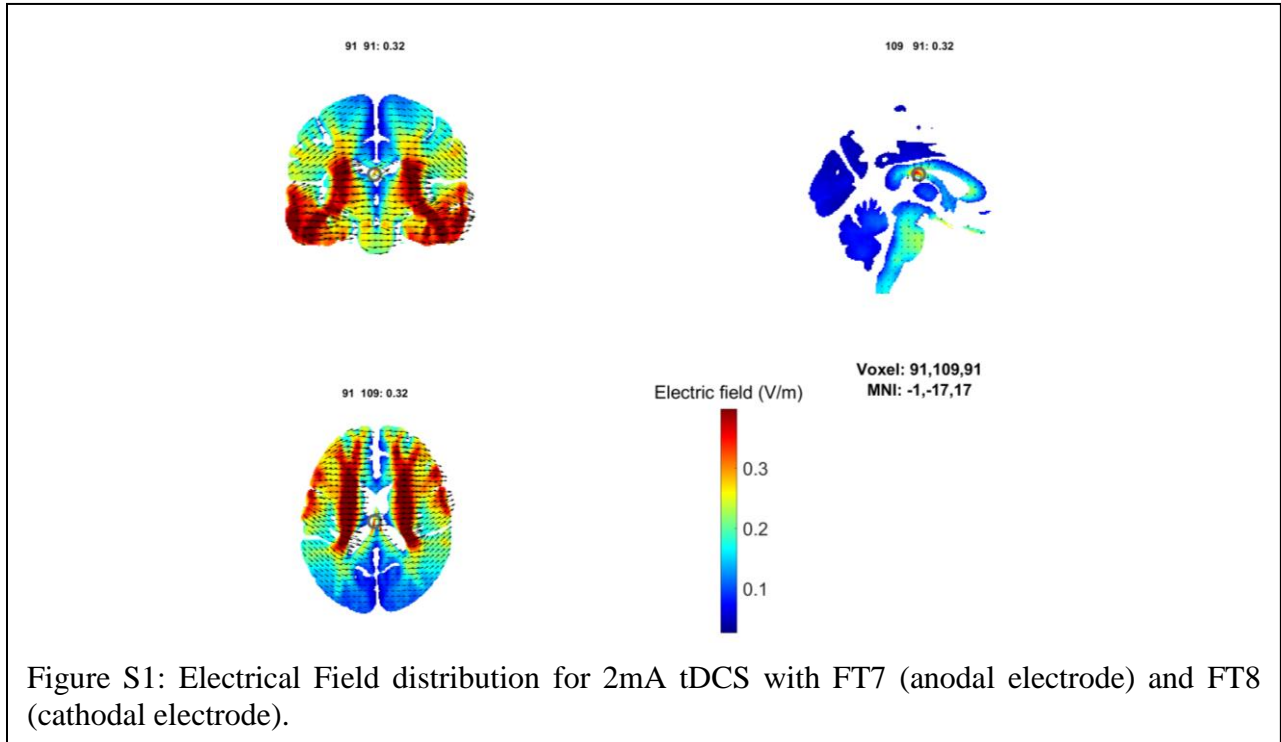

It can be assumed that the tDCS-applied electric field will linearly modify the average membrane potential (V) of the different neuronal subpopulations (within a certain range of intensity)(Molae-Ardekani et al., 2013), i.e.  $\Delta V = \lambda \cdot E$ , where the electric field (E) can be modeled using anatomically realistic full-head model. Then, membrane polarization will lead to vessel response as presented in our prior work (Arora et al., 2021b). Here, tDCS current density at the scalp ( $I_{tdcs}$ ) is assumed to be proportional to the current density ( $J_{tdcs}$ ) in the neurovascular brain tissue based on a leadfield matrix leading to the vasoactive signal via first order transfer function,  $v_i = \frac{\lambda}{s/\tau+1} I_{tdcs}$  (equation i), where  $\lambda$  is arbitrary gain from lead field matrix and  $\tau$  is the time constant (Arora et al., 2021).
