# Supplementary material for: Human-in-the-Loop Optimization of Transcranial Electrical Stimulation at the Point of Care: A Computational Perspective
Source: MDPI journal article supplement (doi:10.3390/brainsci12101294), 2022-09-26
Supplement: s1 [file s1]

## Supplementary Materials: Black box modeling – processed subject data

### SUBJECT 1:

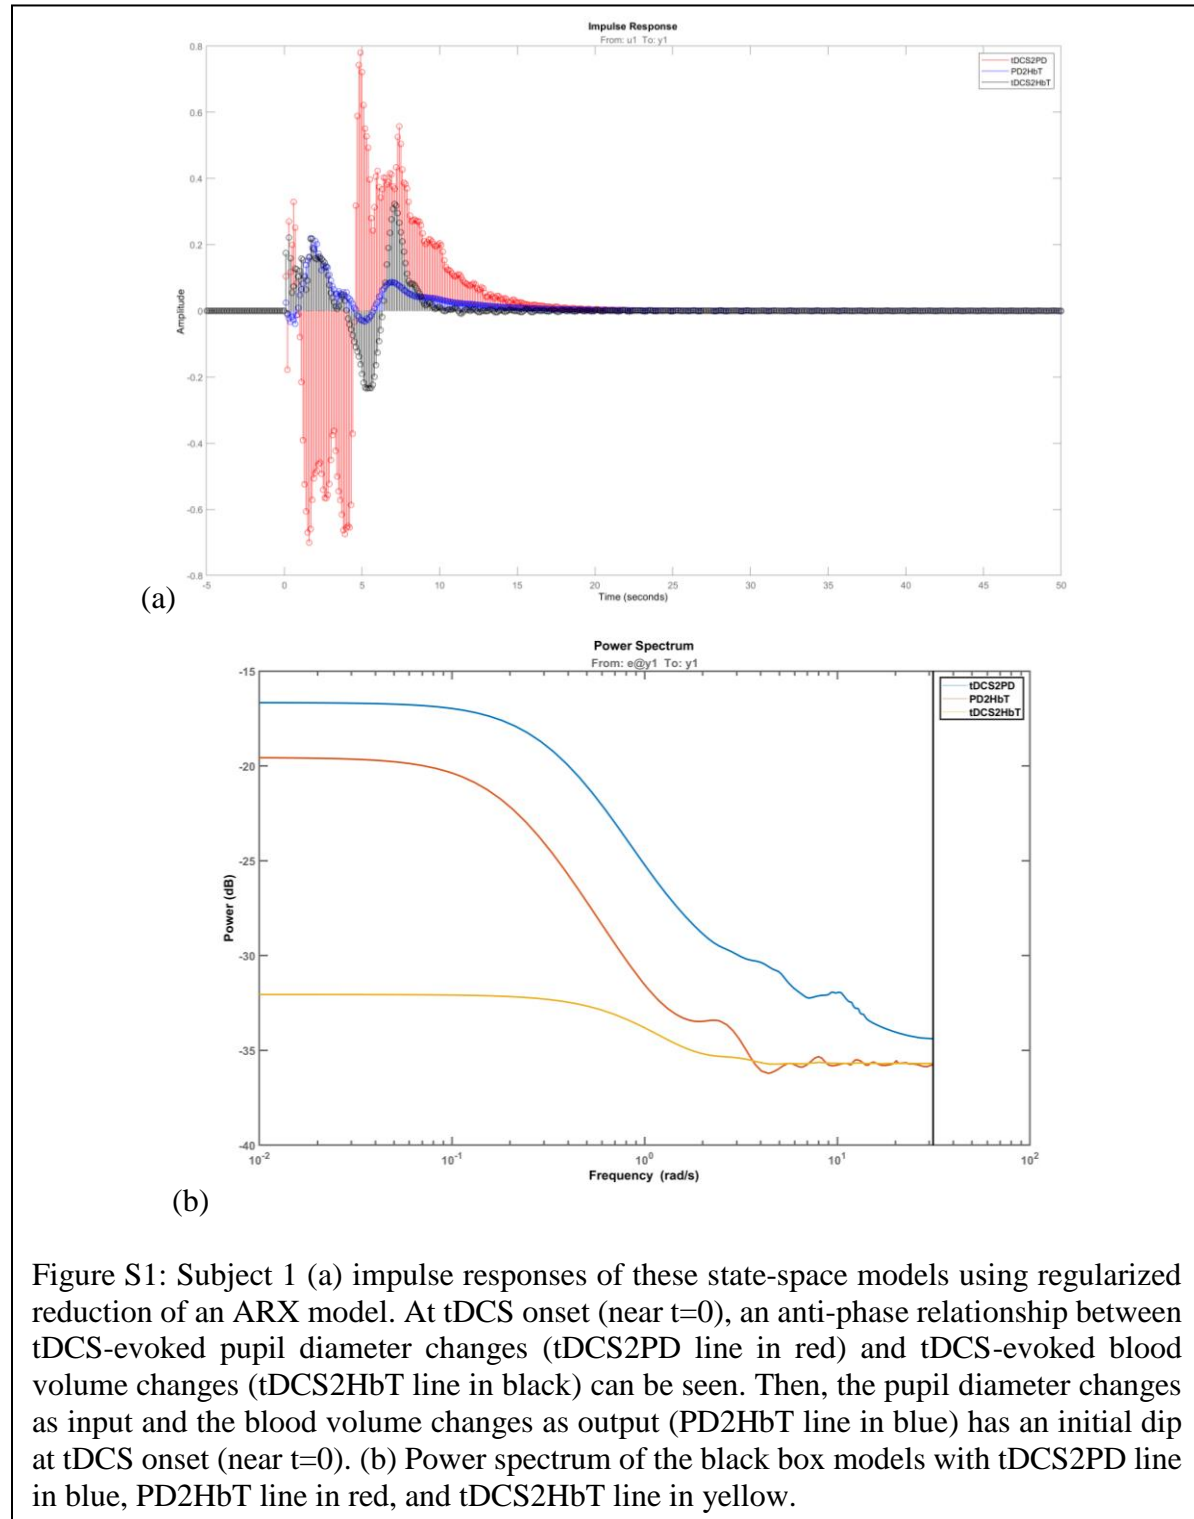

---

## HEMODYNAMIC RESPONSE ANALYSIS

### 0.1. Sample Autocorrelation Function

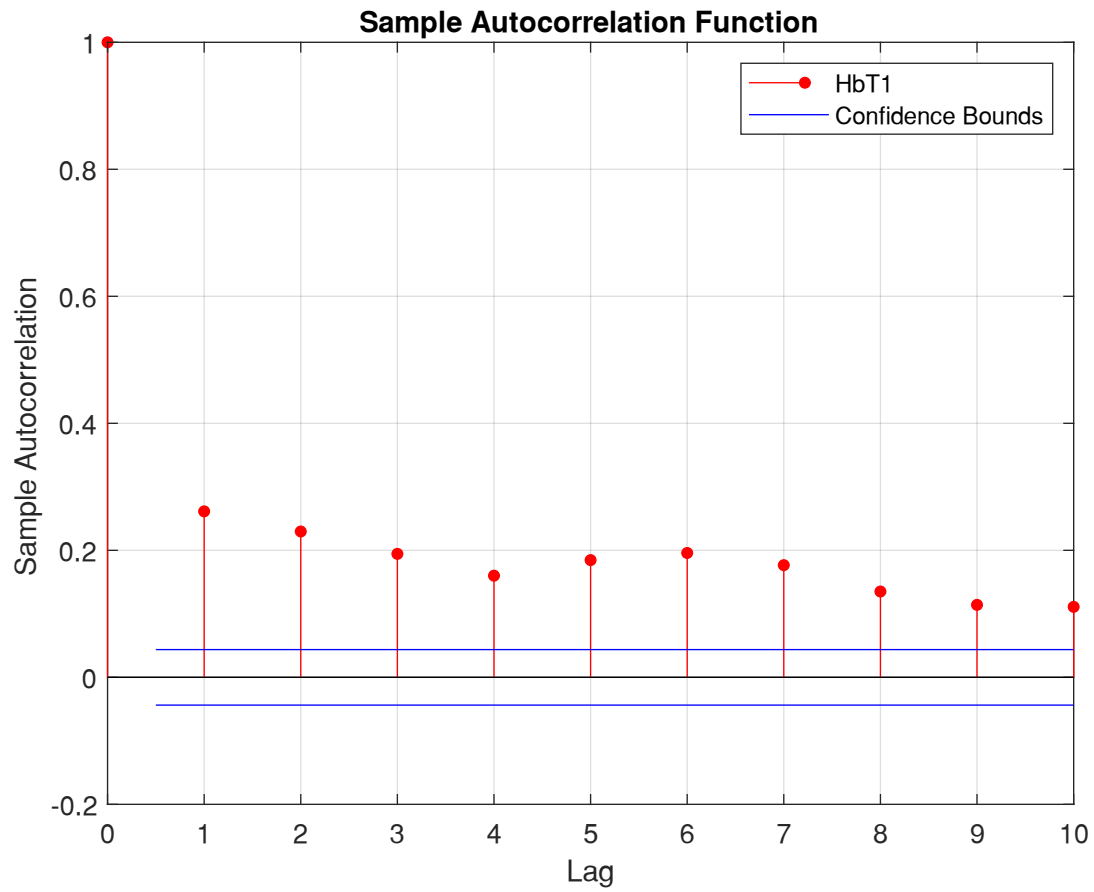

Figure S0.1. Sample autocorrelation function of HbT1

## 0.2. Sample Partial Autocorrelation Function

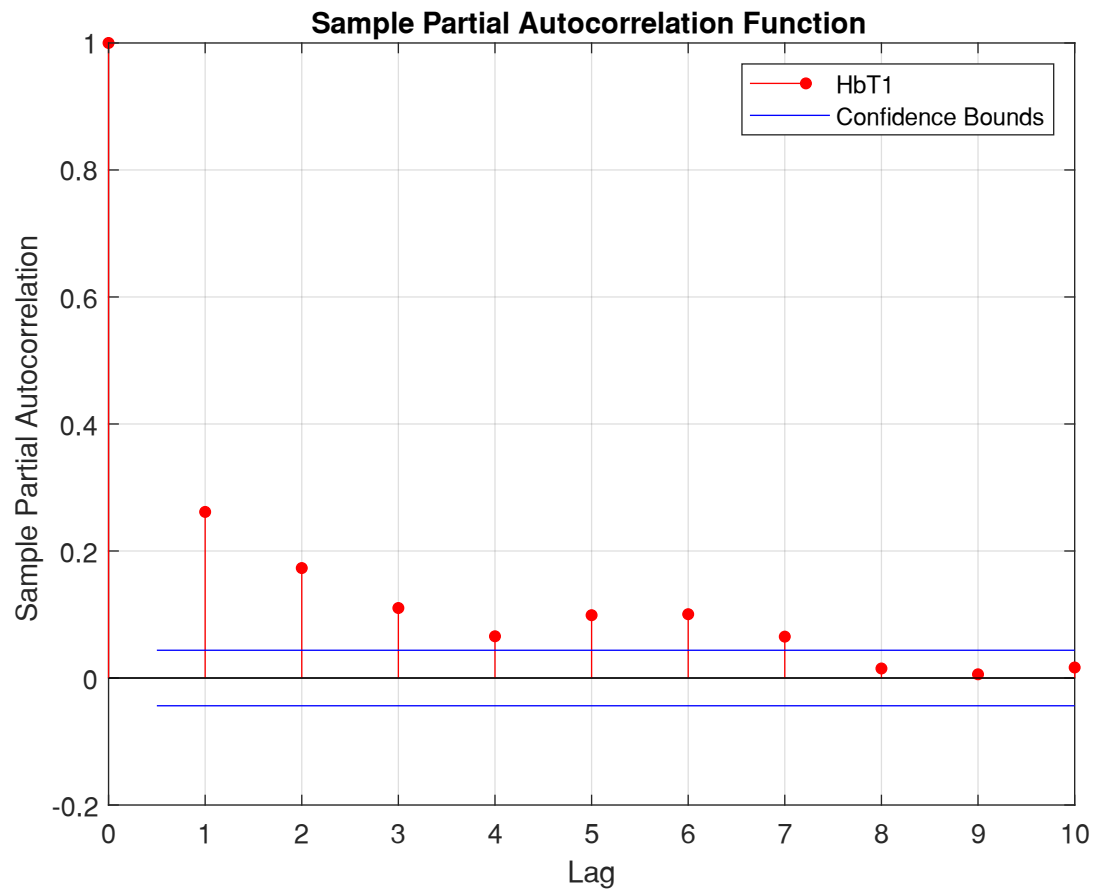

Figure S0.2. Sample partial autocorrelation function of HbT1

---

### 0.3. Augmented Dickey-Fuller Test

Null Hypothesis: HbT1 contains a unit root

$$y_t = c + \delta t + \phi y_{t-1} + \beta_1 \Delta y_{t-1} + \dots + \beta_p \Delta y_{t-p} + \varepsilon_t$$

$$H_0 : \phi = 1$$

$$H_a : \phi < 1$$

**Table S0.1. Test Parameters**

|   | Lags | Model | Test Statistic | Significance Level |
|---|------|-------|----------------|--------------------|
| 1 | 0    | AR    | t1             | 0.025              |
| 2 | 1    | AR    | t1             | 0.025              |

**Table S0.2. Test Results**

|   | Null Rejected | P-Value   | Test Statistic | Critical Value |
|---|---------------|-----------|----------------|----------------|
| 1 | true          | 0.0041435 | -2.9069        | -2.2297        |
| 2 | false         | 0.083913  | -1.7034        | -2.2297        |

#### 0.4. Residual Quantile-Quantile plot

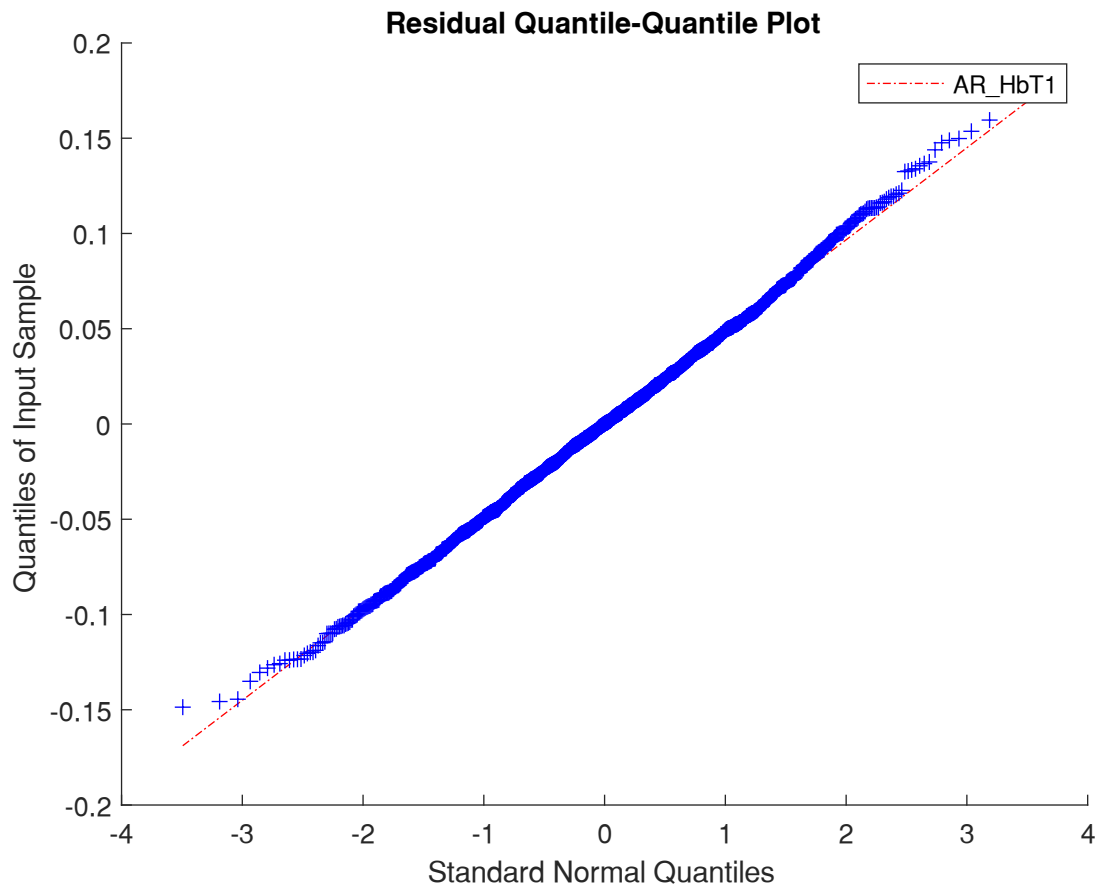

Figure S0.3. Quantile-quantile plot of the residuals of model AR\_HbT1.

## 0.5. Residual Sample Autocorrelation Function

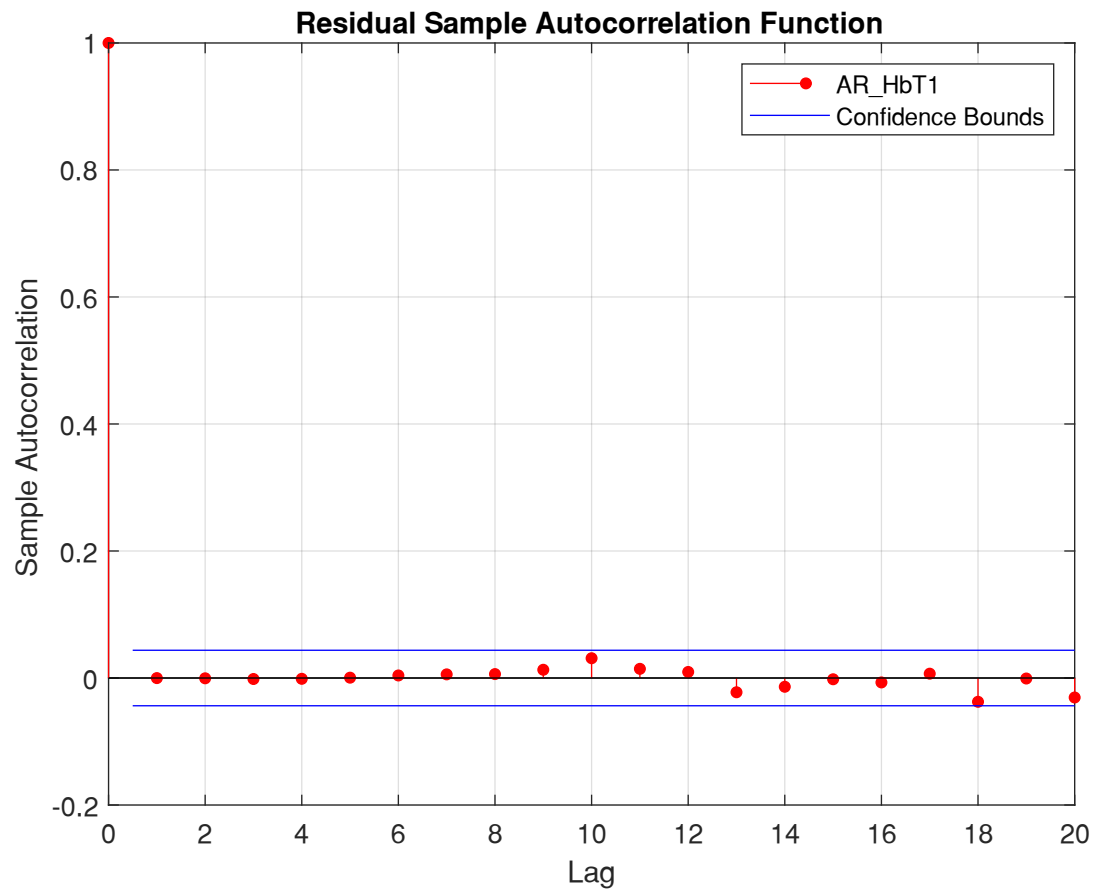

Figure S0.4. Sample autocorrelation function of the residuals of AR\_HbT1

---

## 0.6. Ljung-Box Q-Test

Null Hypothesis: The first  $m$  autocorrelations of the residuals of AR\_HbT1 are jointly 0

$$H_0 : \rho_1 = \rho_2 = \dots = \rho_m = 0$$

$$H_a : \rho_j \neq 0, j \in 1, \dots, m$$

**Table S0.3. Test Parameters**

|   | Lags | DOF | Significance Level |
|---|------|-----|--------------------|
| 1 | 10   | 10  | 0.025              |

**Table S0.4. Test Results**

|   | Null Rejected | P-Value | Test Statistic | Critical Value |
|---|---------------|---------|----------------|----------------|
| 1 | false         | 0.98949 | 2.5904         | 20.4832        |

## 1.ARIMA(8,0,0) Model (Gaussian Distribution) (AR\_HbT1)

Autoregressive model of time series HbT1 with the following equation:

$$(1 - \phi_1 L - \dots - \phi_8 L^8) y_t = c + \varepsilon_t$$

### 1.1. Model Estimation

**Table S1.1. Estimation Results**

| Parameter | Value     | Standard Error | t Statistic | P-Value     |
|-----------|-----------|----------------|-------------|-------------|
| Constant  | 0.19233   | 0.018495       | 10.399      | 2.5047e-25  |
| AR{1}     | 0.16617   | 0.021338       | 7.7873      | 6.8434e-15  |
| AR{2}     | 0.11833   | 0.021775       | 5.434       | 5.5095e-08  |
| AR{3}     | 0.072029  | 0.022372       | 3.2197      | 0.0012834   |
| AR{4}     | 0.028312  | 0.022964       | 1.2329      | 0.21762     |
| AR{5}     | 0.071318  | 0.023155       | 3.0801      | 0.0020695   |
| AR{6}     | 0.087432  | 0.022378       | 3.907       | 9.3432e-05  |
| AR{7}     | 0.062832  | 0.022398       | 2.8052      | 0.0050286   |
| AR{8}     | 0.015075  | 0.022561       | 0.66818     | 0.50402     |
| Variance  | 0.0024178 | 7.4309e-05     | 32.5374     | 3.1559e-232 |

**Table S1.2. Goodness of Fit**

|     |            |
|-----|------------|
| AIC | -6653.6037 |
| BIC | -6597.1737 |



## PUPIL DILATION ANALYSIS

### 1.2. Sample Autocorrelation Function

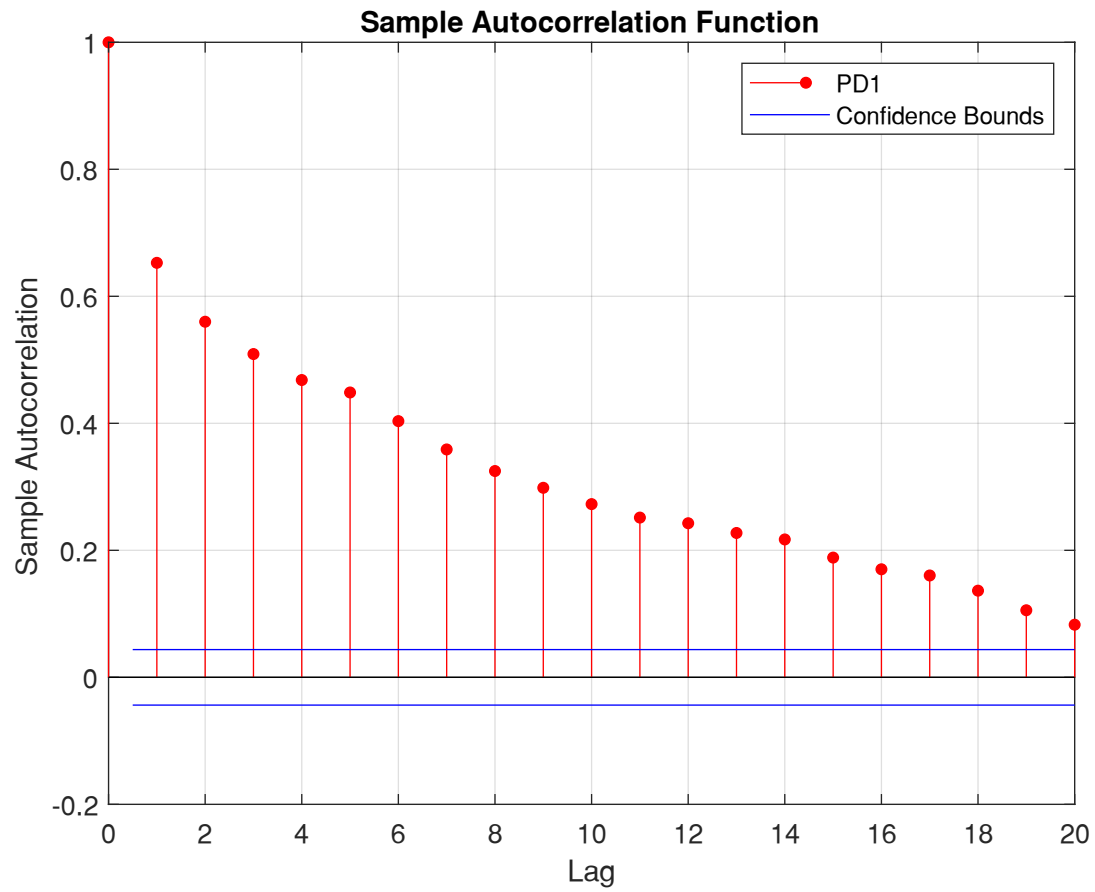

Figure S1.1. Sample autocorrelation function of PD1

### 1.3. Sample Partial Autocorrelation Function

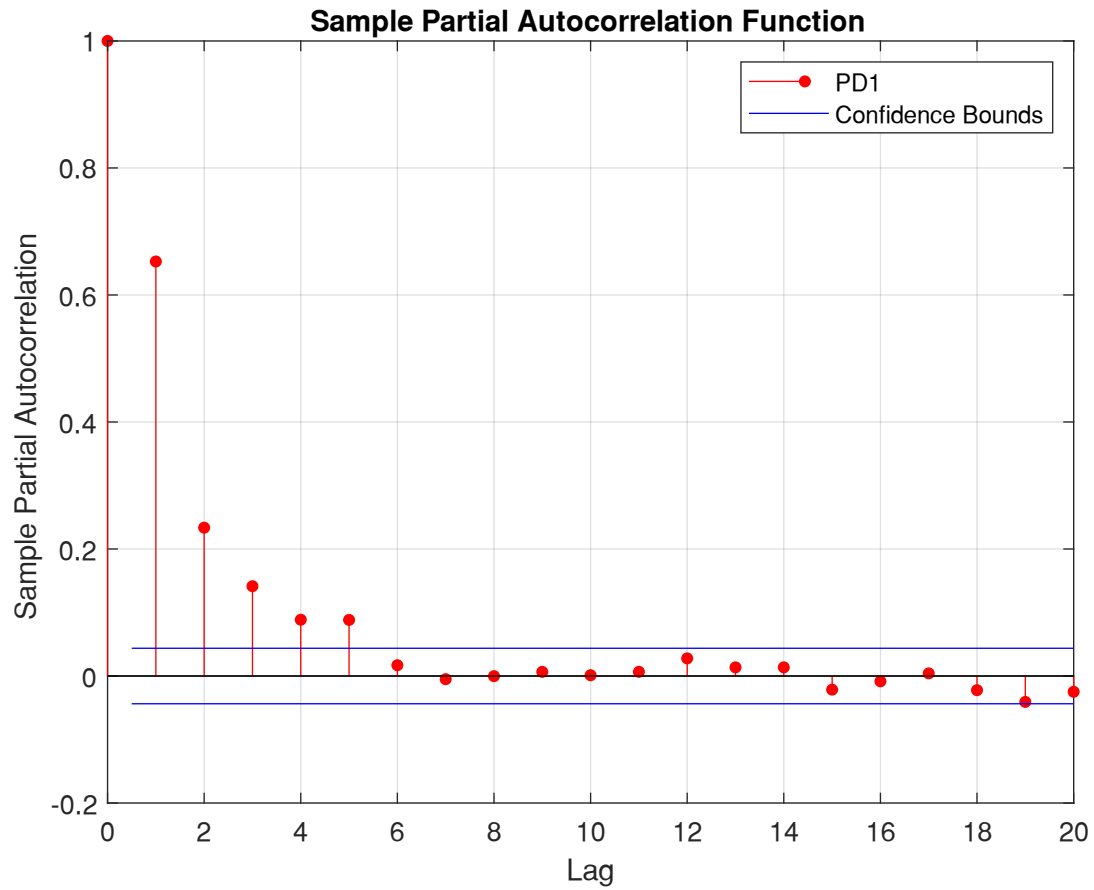

Figure S1.2. Sample partial autocorrelation function of PD1

#### 1.4. Augmented Dickey-Fuller Test

Null Hypothesis: PD1 contains a unit root

$$y_t = c + \delta t + \phi y_{t-1} + \beta_1 \Delta y_{t-1} + \dots + \beta_p \Delta y_{t-p} + \varepsilon_t$$

$$H_0 : \phi = 1$$

$$H_a : \phi < 1$$

**Table S1.3. Test Parameters**

|   | Lags | Model | Test Statistic | Significance Level |
|---|------|-------|----------------|--------------------|
| 1 | 0    | AR    | t1             | 0.025              |
| 2 | 1    | AR    | t1             | 0.025              |

**Table S1.4. Test Results**

|   | Null Rejected | P-Value   | Test Statistic | Critical Value |
|---|---------------|-----------|----------------|----------------|
| 1 | true          | 0.0091633 | -2.6081        | -2.2297        |
| 2 | false         | 0.069677  | -1.7917        | -2.2297        |

## 2.ARIMA(6,0,0) Model (Gaussian Distribution) (AR\_PD1)

Autoregressive model of time series PD1 with the following equation:

$$(1 - \phi_1 L - \dots - \phi_6 L^6)y_t = c + \varepsilon_t$$

### 2.1. Model Estimation

**Table S2.1. Estimation Results**

| Parameter | Value    | Standard Error | t Statistic | P-Value    |
|-----------|----------|----------------|-------------|------------|
| Constant  | 0.13812  | 0.017161       | 8.0486      | 8.3779e-16 |
| AR{1}     | 0.4453   | 0.010902       | 40.8451     | 0          |
| AR{2}     | 0.13881  | 0.015567       | 8.9168      | 4.8005e-19 |
| AR{3}     | 0.085505 | 0.023947       | 3.5706      | 0.00035622 |
| AR{4}     | 0.046212 | 0.029329       | 1.5757      | 0.1151     |
| AR{5}     | 0.080899 | 0.020683       | 3.9114      | 9.1764e-05 |
| AR{6}     | 0.016995 | 0.031016       | 0.54795     | 0.58373    |
| Variance  | 0.005413 | 7.7163e-05     | 70.1494     | 0          |

**Table S2.2. Goodness of Fit**

|     |            |
|-----|------------|
| AIC | -4969.981  |
| BIC | -4924.8293 |

## 2.2. Residual Quantile-Quantile plot

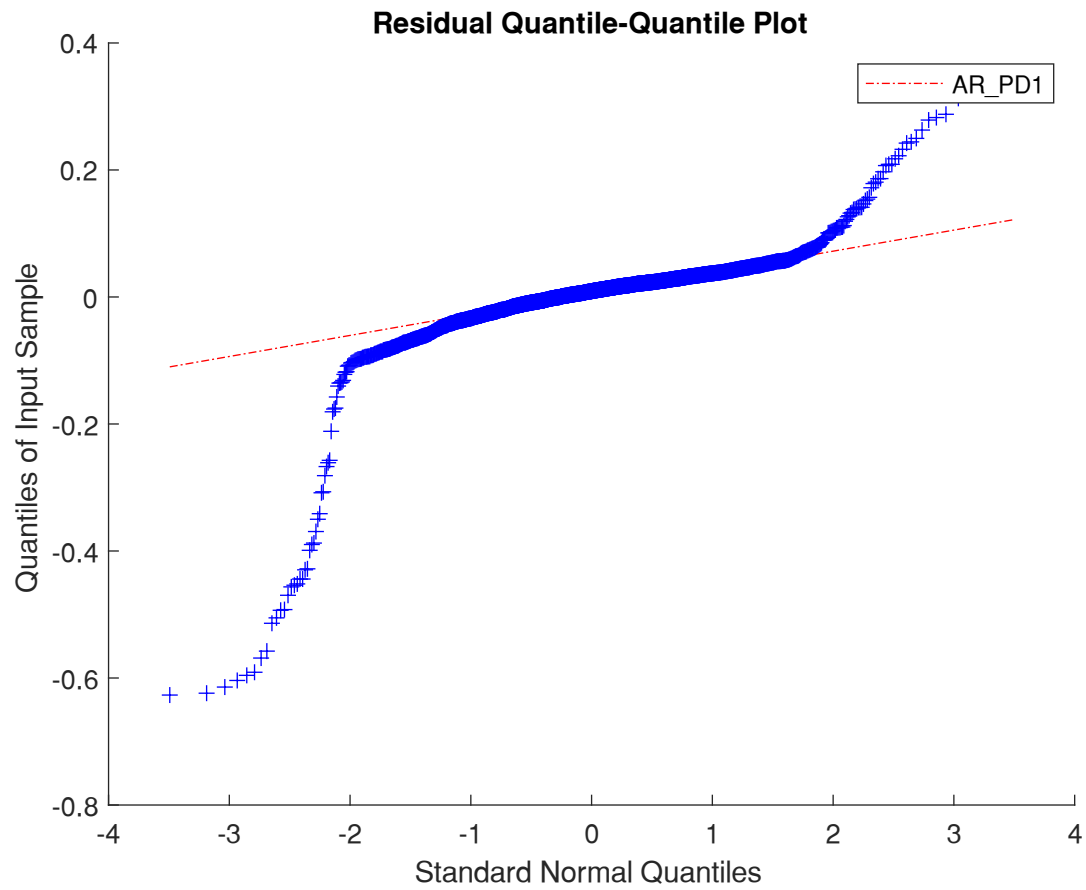

Figure S2.1. Quantile-quantile plot of the residuals of model AR\_PD1.

### 2.3. Residual Sample Autocorrelation Function

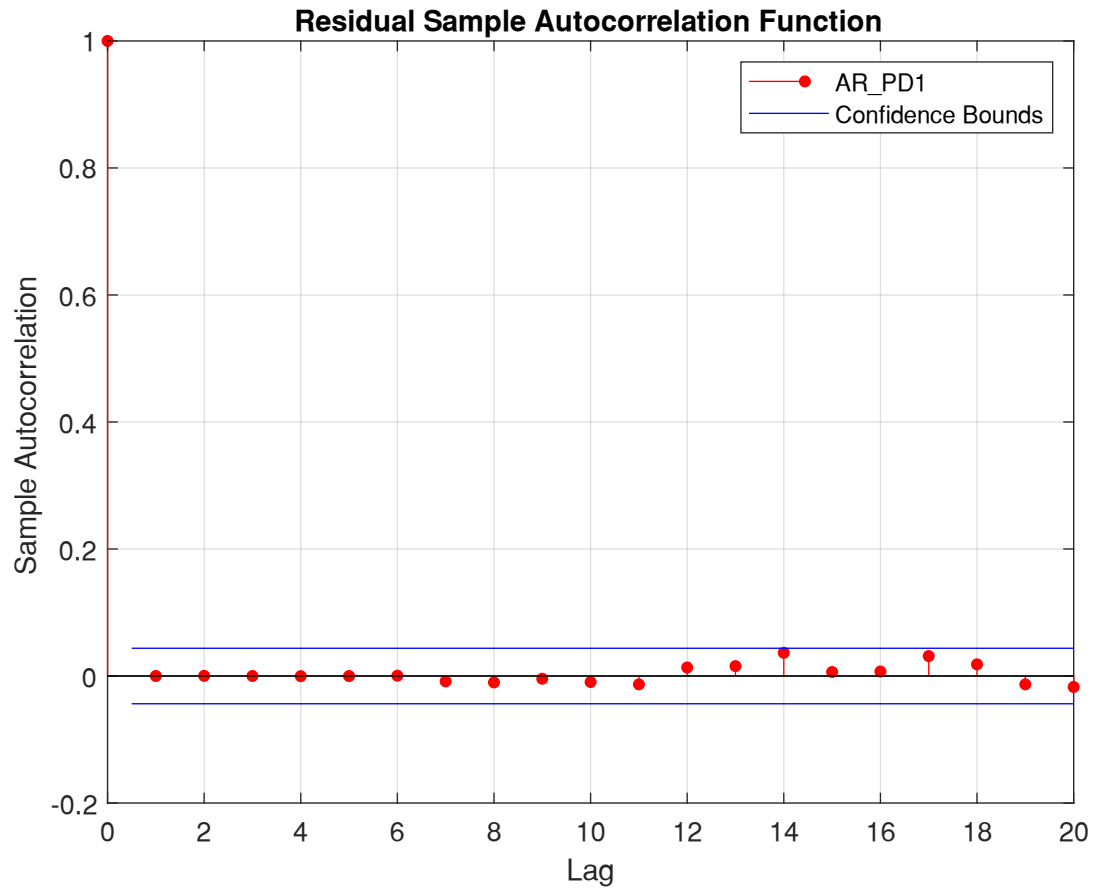

Figure S2.2. Sample autocorrelation function of the residuals of AR\_PD1

## 2.4. Ljung-Box Q-Test

Null Hypothesis: The first  $m$  autocorrelations of the residuals of AR\_PD1 are jointly 0

$$H_0 : \rho_1 = \rho_2 = \dots = \rho_m = 0$$

$$H_a : \rho_j \neq 0, j \in 1, \dots, m$$

**Table S2.3. Test Parameters**

|   | Lags | DOF | Significance Level |
|---|------|-----|--------------------|
| 1 | 10   | 10  | 0.025              |

**Table S2.4. Test Results**

|   | Null Rejected | P-Value | Test Statistic | Critical Value |
|---|---------------|---------|----------------|----------------|
| 1 | false         | 0.99999 | 0.59043        | 20.4832        |

## 3. GCtest 'blockwise'

| H0                                        | Decision           | Distribution | Statistic | PValue   | CriticalValue |
|-------------------------------------------|--------------------|--------------|-----------|----------|---------------|
| "Exclude lagged tDCS in HbT,PD equations" | "Reject H0"        | "F(50,1988)" | 1.3635    | 0.047238 | 1.3567        |
| H0                                        | Decision           | Distribution | Statistic | PValue   | CriticalValue |
| "Exclude lagged tDCS in HbT equations"    | "Cannot reject H0" | "F(25,1988)" | 1.1612    | 0.26444  | 1.5116        |
| H0                                        | Decision           | Distribution | Statistic | PValue   | CriticalValue |
| "Exclude lagged tDCS in PD equations"     | "Reject H0"        | "F(25,1988)" | 1.5654    | 0.037029 | 1.5116        |

## SUBJECT 2:

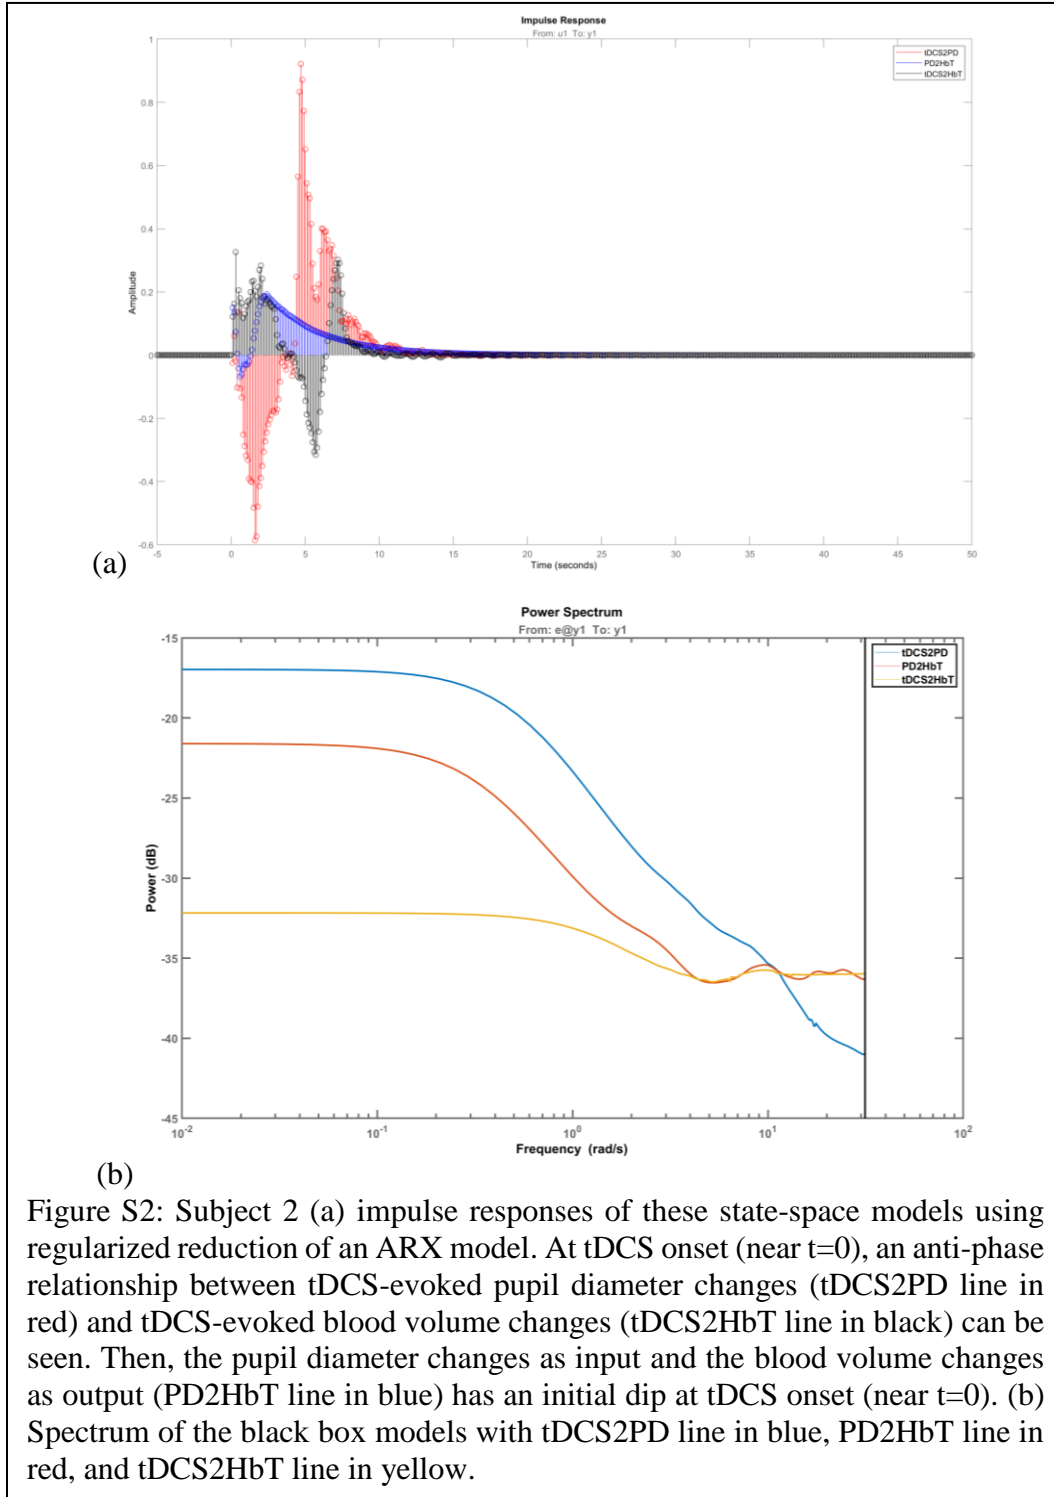



## HEMODYNAMIC RESPONSE ANALYSIS

### 2.5. Sample Autocorrelation Function

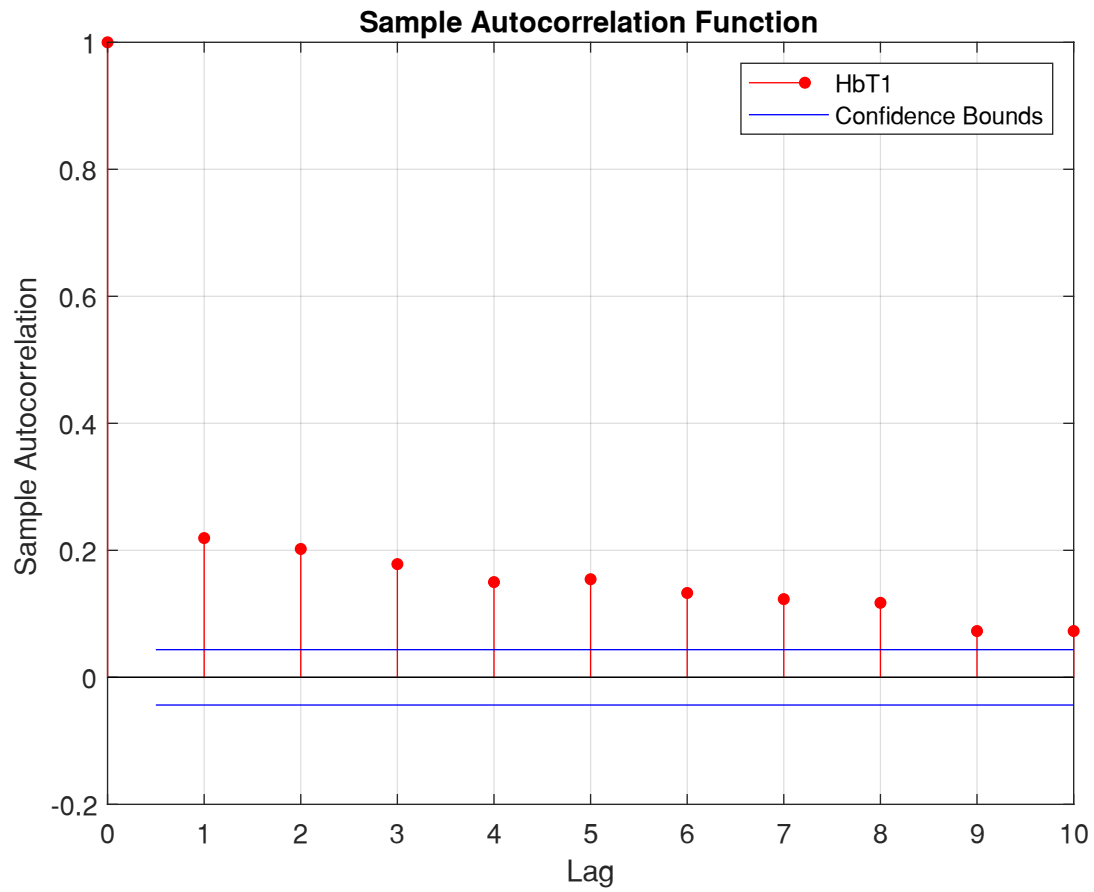

Figure S2.3. Sample autocorrelation function of HbT1

## 2.6. Sample Partial Autocorrelation Function

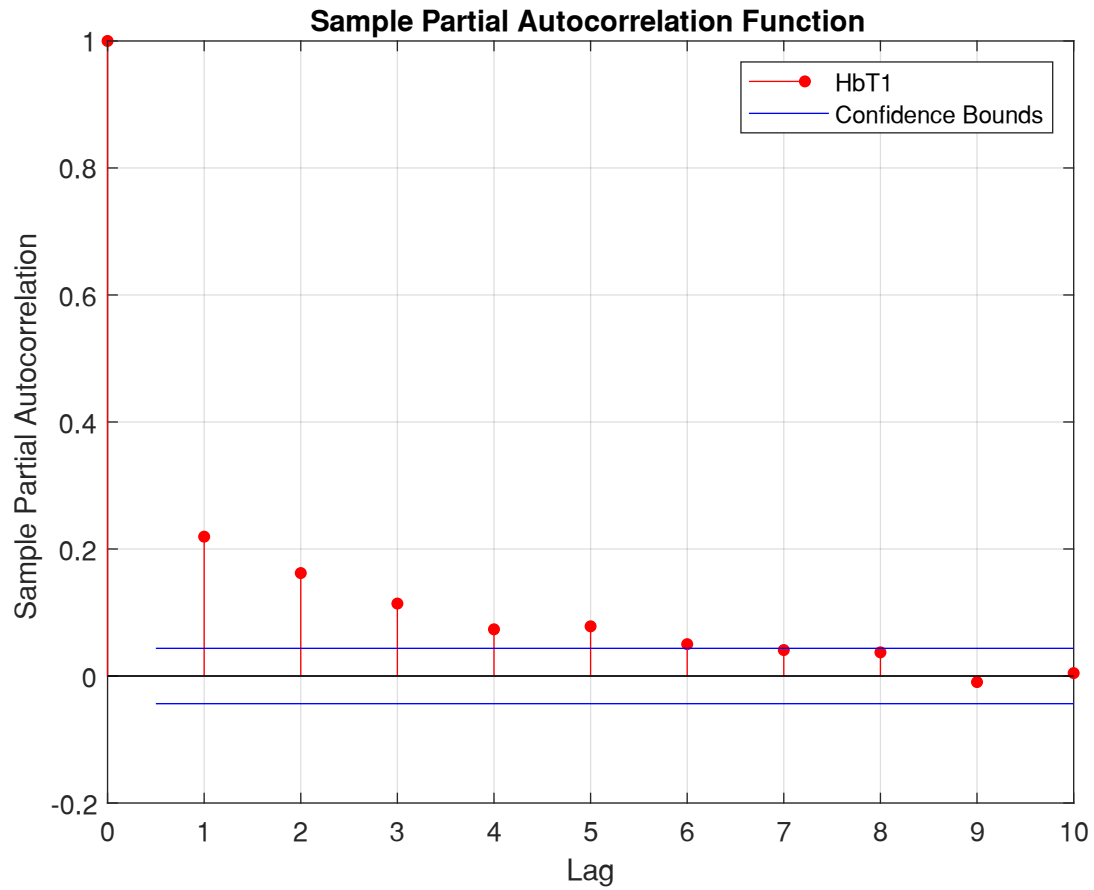

Figure S2.4. Sample partial autocorrelation function of HbT1

## 2.7. Augmented Dickey-Fuller Test

Null Hypothesis: HbT1 contains a unit root

$$y_t = c + \delta t + \phi y_{t-1} + \beta_1 \Delta y_{t-1} + \dots + \beta_p \Delta y_{t-p} + \varepsilon_t$$

$$H_0 : \phi = 1$$

$$H_a : \phi < 1$$

**Table S2.5. Test Parameters**

|   | Lags | Model | Test Statistic | Significance Level |
|---|------|-------|----------------|--------------------|
| 1 | 0    | AR    | t1             | 0.025              |
| 2 | 1    | AR    | t1             | 0.025              |

**Table S2.6. Test Results**

|   | Null Rejected | P-Value   | Test Statistic | Critical Value |
|---|---------------|-----------|----------------|----------------|
| 1 | true          | 0.0037126 | -2.9593        | -2.2297        |
| 2 | false         | 0.076516  | -1.7476        | -2.2297        |

### 3.ARIMA(8,0,0) Model (Gaussian Distribution) (AR\_HbT1)

Autoregressive model of time series HbT1 with the following equation:

$$(1 - \phi_1 L - \dots - \phi_8 L^8)y_t = c + \varepsilon_t$$

#### 3.1. Model Estimation

**Table S3.1. Estimation Results**

| Parameter | Value     | Standard Error | t Statistic | P-Value     |
|-----------|-----------|----------------|-------------|-------------|
| Constant  | 0.23456   | 0.020836       | 11.2573     | 2.1328e-29  |
| AR{1}     | 0.14382   | 0.021526       | 6.6814      | 2.3661e-11  |
| AR{2}     | 0.11524   | 0.022208       | 5.1891      | 2.1136e-07  |
| AR{3}     | 0.082407  | 0.021828       | 3.7753      | 0.00015984  |
| AR{4}     | 0.049584  | 0.022605       | 2.1935      | 0.028269    |
| AR{5}     | 0.062688  | 0.022536       | 2.7817      | 0.0054075   |
| AR{6}     | 0.039797  | 0.021485       | 1.8523      | 0.063981    |
| AR{7}     | 0.035496  | 0.021959       | 1.6164      | 0.106       |
| AR{8}     | 0.037428  | 0.022535       | 1.6609      | 0.096735    |
| Variance  | 0.0027903 | 9.0416e-05     | 30.8607     | 4.0249e-209 |

**Table S3.2. Goodness of Fit**

|     |            |
|-----|------------|
| AIC | -6390.0801 |
| BIC | -6333.5927 |

### 3.2. Residual Quantile-Quantile plot

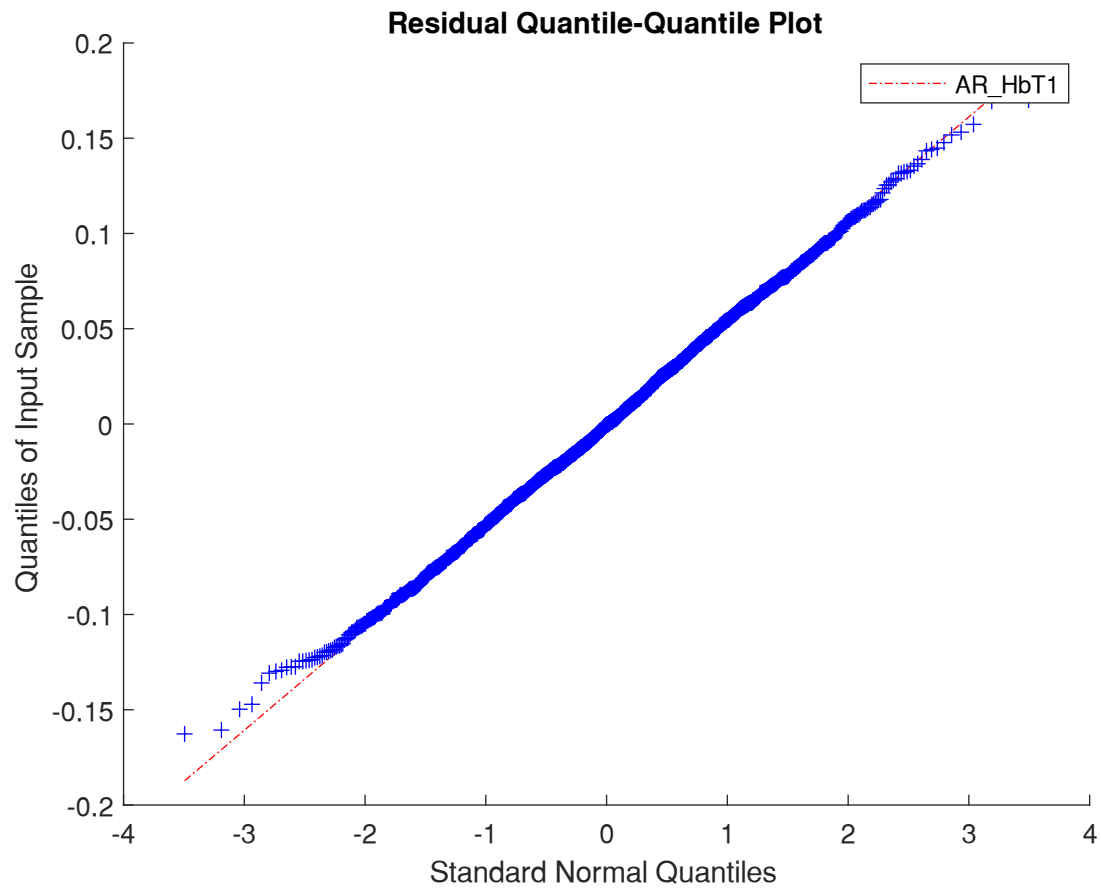

Figure S3.1. Quantile-quantile plot of the residuals of model AR\_HbT1.

### 3.3. Residual Sample Autocorrelation Function

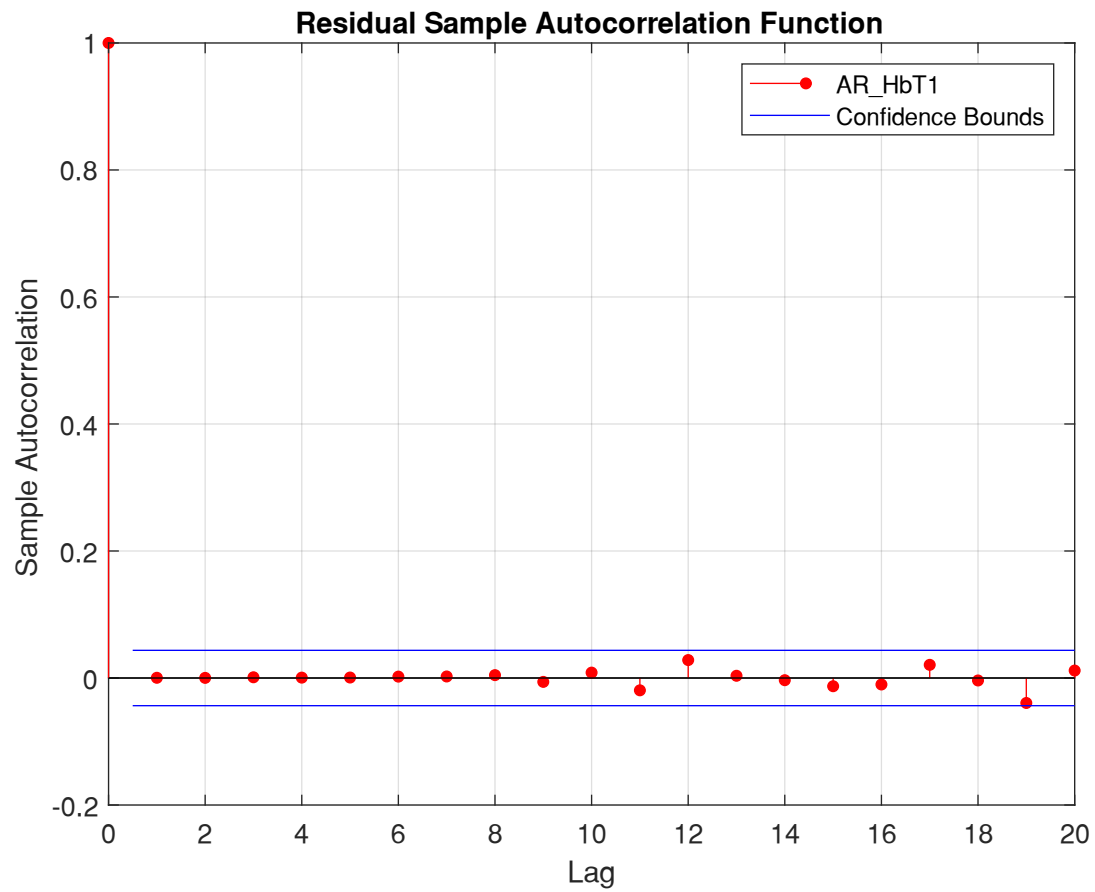

Figure S3.2. Sample autocorrelation function of the residuals of AR\_HbT1

### 3.4. Ljung-Box Q-Test

Null Hypothesis: The first m autocorrelations of the residuals of AR\_HbT1 are jointly 0

$$H_0 : \rho_1 = \rho_2 = \dots = \rho_m = 0$$

$$H_a : \rho_j \neq 0, j \in 1, \dots, m$$

**Table S3.3. Test Parameters**

|   | Lags | DOF | Significance Level |
|---|------|-----|--------------------|
| 1 | 10   | 10  | 0.025              |

**Table S3.4. Test Results**

|   | Null Rejected | P-Value | Test Statistic | Critical Value |
|---|---------------|---------|----------------|----------------|
| 1 | false         | 1       | 0.30188        | 20.4832        |

## PUPIL DILATION ANALYSIS

### 3.5. Sample Autocorrelation Function

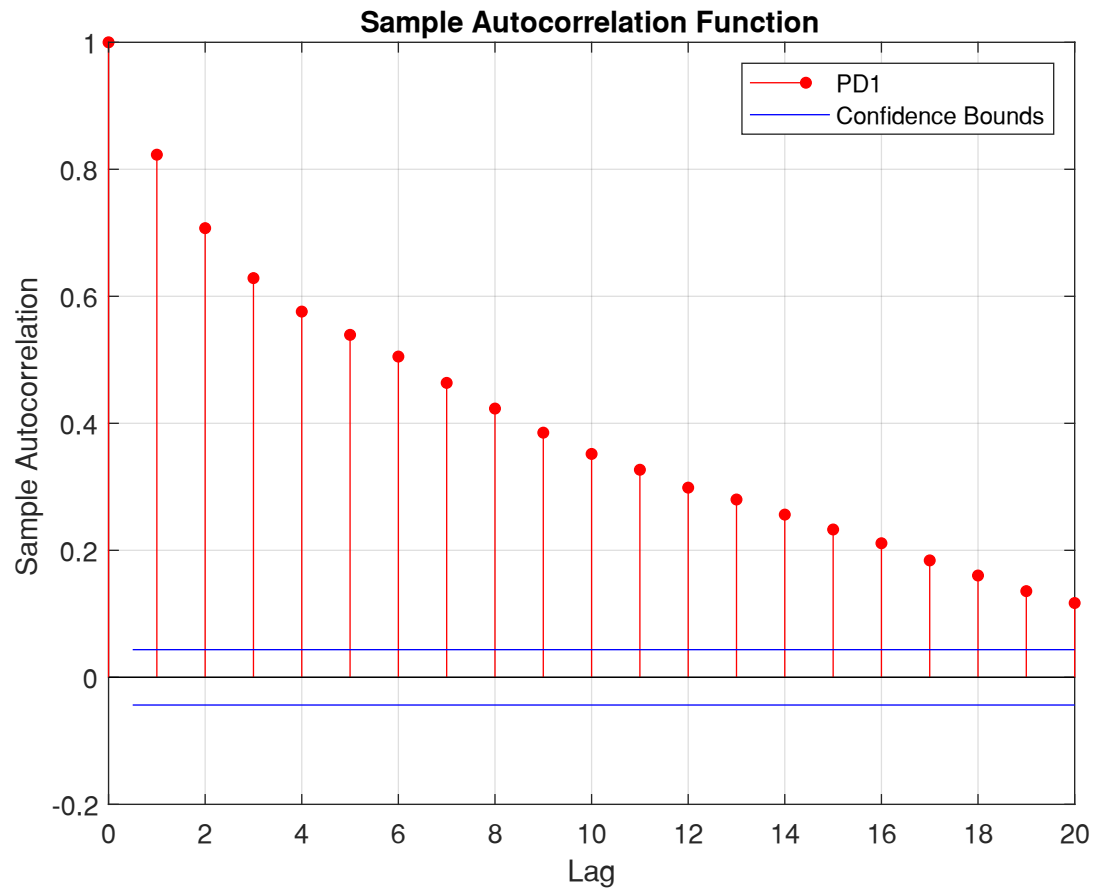

Figure S3.3. Sample autocorrelation function of PD1



### 3.6. Sample Partial Autocorrelation Function

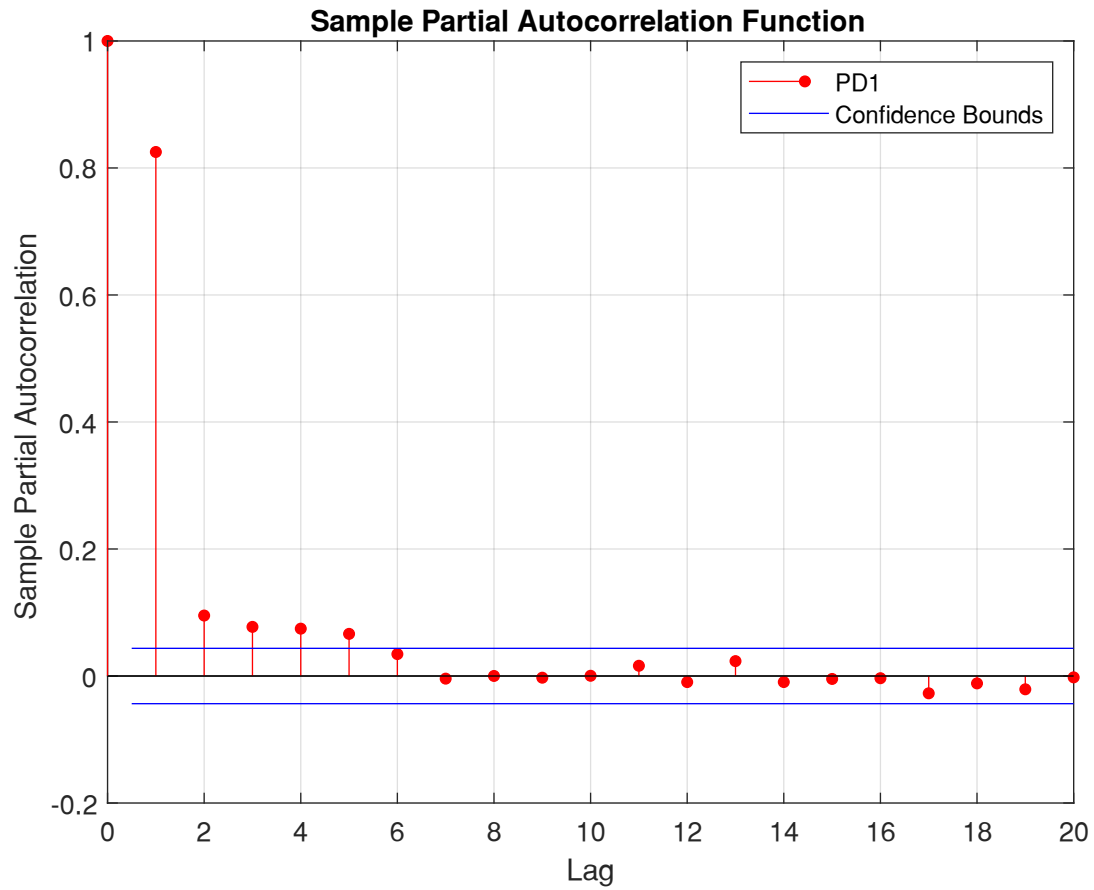

Figure S3.4. Sample partial autocorrelation function of PD1

### 3.7. Augmented Dickey-Fuller Test

Null Hypothesis: PD1 contains a unit root

$$y_t = c + \delta t + \phi y_{t-1} + \beta_1 \Delta y_{t-1} + \dots + \beta_p \Delta y_{t-p} + \varepsilon_t$$

$$H_0 : \phi = 1$$

$$H_a : \phi < 1$$

**Table S3.5. Test Parameters**

|   | Lags | Model | Test Statistic | Significance Level |
|---|------|-------|----------------|--------------------|
| 1 | 0    | AR    | t1             | 0.025              |
| 2 | 1    | AR    | t1             | 0.025              |

**Table S3.6. Test Results**

|   | Null Rejected | P-Value  | Test Statistic | Critical Value |
|---|---------------|----------|----------------|----------------|
| 1 | false         | 0.089199 | -1.6736        | -2.2297        |
| 2 | false         | 0.1573   | -1.3762        | -2.2297        |

#### 4.ARIMA(6,0,0) Model (Gaussian Distribution) (AR\_PD1)

Autoregressive model of time series PD1 with the following equation:

$$(1 - \phi_1 L - \dots - \phi_6 L^6)y_t = c + \varepsilon_t$$

##### 4.1. Model Estimation

**Table S4.1. Estimation Results**

| Parameter | Value     | Standard Error | t Statistic | P-Value   |
|-----------|-----------|----------------|-------------|-----------|
| Constant  | 0.077606  | 0.010461       | 7.4189      | 1.181e-13 |
| AR{1}     | 0.7266    | 0.0097309      | 74.6692     | 0         |
| AR{2}     | 0.032565  | 0.0172         | 1.8933      | 0.058321  |
| AR{3}     | 0.019539  | 0.020517       | 0.95233     | 0.34093   |
| AR{4}     | 0.024956  | 0.039448       | 0.63263     | 0.52698   |
| AR{5}     | 0.04137   | 0.046724       | 0.8854      | 0.37594   |
| AR{6}     | 0.034521  | 0.035417       | 0.97471     | 0.3297    |
| Variance  | 0.0022127 | 2.4091e-05     | 91.8441     | 0         |

**Table S4.2. Goodness of Fit**

|     |            |
|-----|------------|
| AIC | -6882.5811 |
| BIC | -6837.3835 |

## 4.2. Residual Quantile-Quantile plot

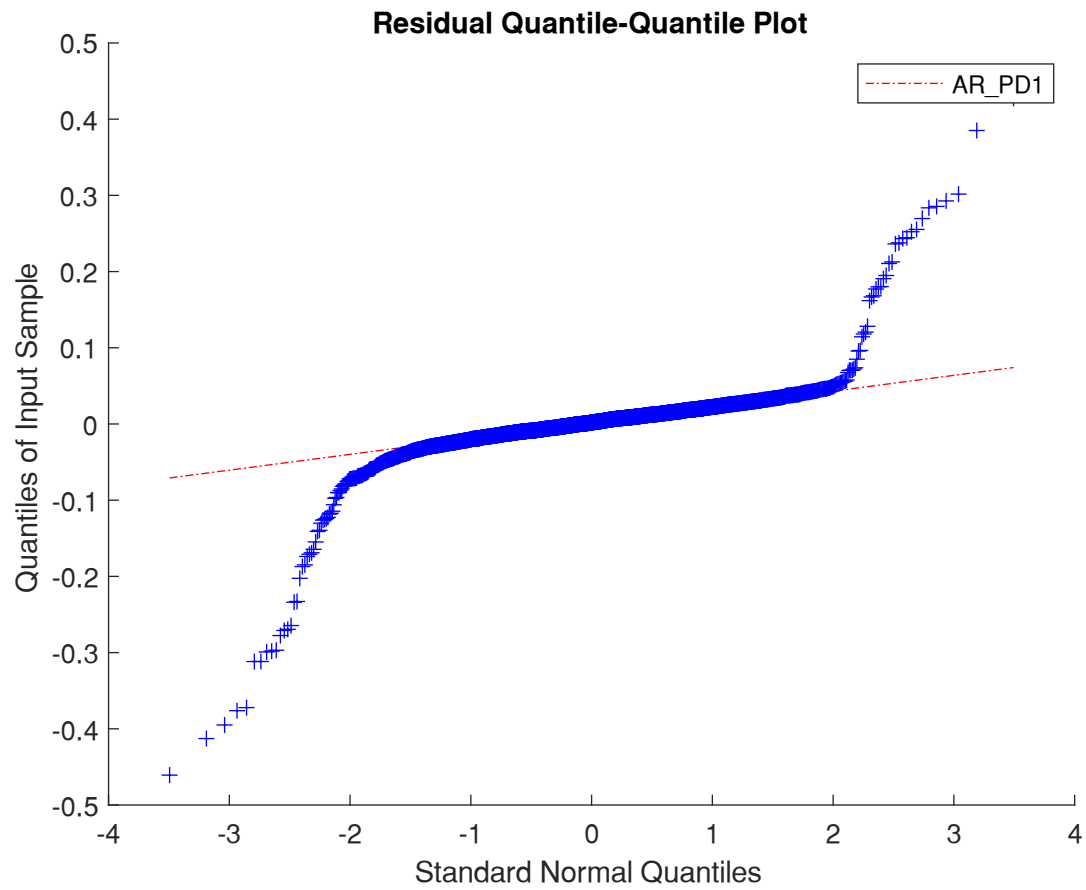

Figure S4.1. Quantile-quantile plot of the residuals of model AR\_PD1.

### 4.3. Residual Sample Autocorrelation Function

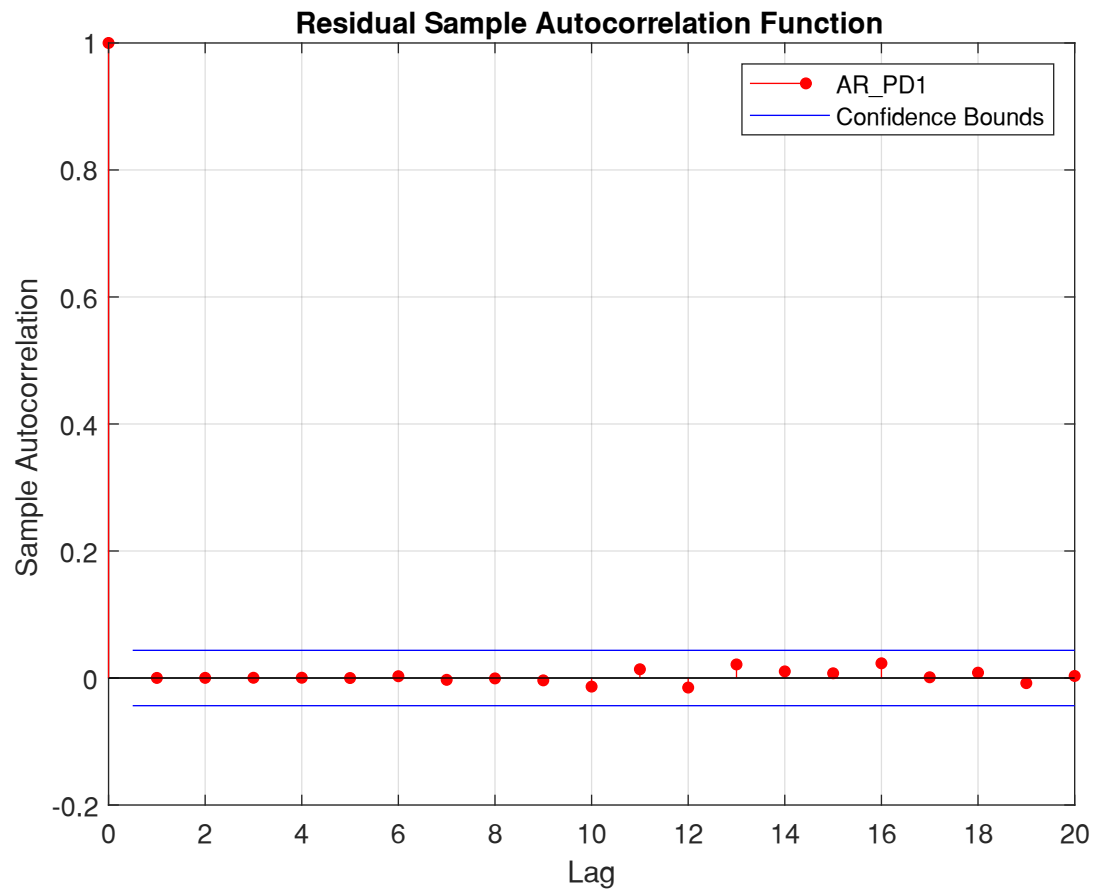

Figure S4.2. Sample autocorrelation function of the residuals of AR\_PD1

#### 4.4. Ljung-Box Q-Test

Null Hypothesis: The first  $m$  autocorrelations of the residuals of AR\_PD1 are jointly 0

$$H_0 : \rho_1 = \rho_2 = \dots = \rho_m = 0$$

$$H_a : \rho_j \neq 0, j \in 1, \dots, m$$

**Table S4.3. Test Parameters**

|   | Lags | DOF | Significance Level |
|---|------|-----|--------------------|
| 1 | 10   | 10  | 0.025              |

**Table S4.4. Test Results**

|   | Null Rejected | P-Value | Test Statistic | Critical Value |
|---|---------------|---------|----------------|----------------|
| 1 | false         | 1       | 0.45188        | 20.4832        |

### 3. GCTest 'blockwise'

| H0                                        | Decision           | Distribution | Statistic | PValue    | CriticalValue |
|-------------------------------------------|--------------------|--------------|-----------|-----------|---------------|
| "Exclude lagged tDCS in HbT,PD equations" | "Reject H0"        | "F(52,1997)" | 1.6876    | 0.0017003 | 1.3496        |
| H0                                        | Decision           | Distribution | Statistic | PValue    | CriticalValue |
| "Exclude lagged tDCS in HbT equations"    | "Reject H0"        | "F(26,1997)" | 1.9044    | 0.0039087 | 1.5012        |
| H0                                        | Decision           | Distribution | Statistic | PValue    | CriticalValue |
| "Exclude lagged tDCS in PD equations"     | "Cannot reject H0" | "F(26,1997)" | 1.4773    | 0.057114  | 1.5012        |

## SUBJECT 3:

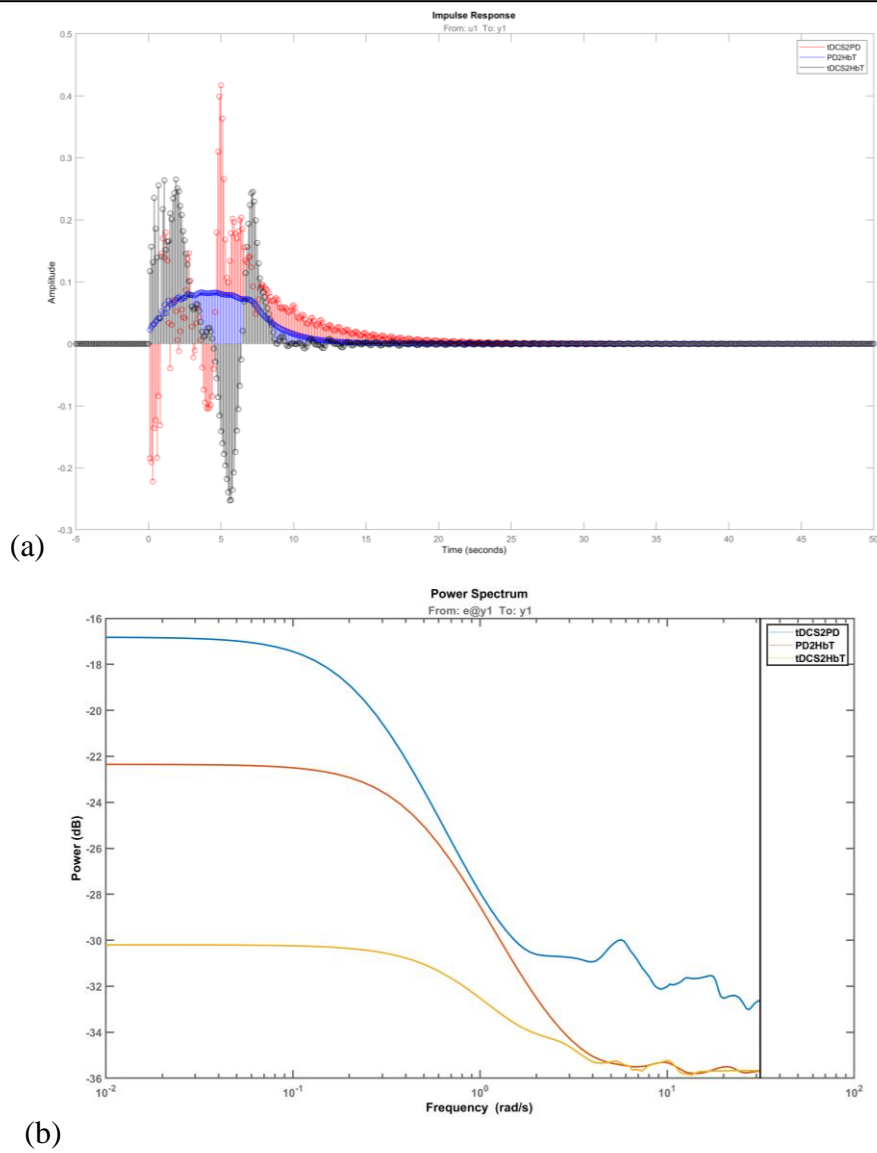

Figure S3: Subject 3 (a) impulse responses of these state-space models using regularized reduction of an ARX model. Partly, an anti-phase relationship between tDCS-evoked pupil diameter changes (tDCS2PD line in red) and tDCS-evoked blood volume changes (tDCS2HbT line in black) can be seen. Then, the pupil diameter changes as input and the blood volume changes as output (PD2HbT line in blue) has no initial dip at tDCS onset (near  $t=0$ ). (b) Spectrum of the black box models with tDCS2PD line in blue, PD2HbT line in red, and tDCS2HbT line in yellow.

## HEMODYNAMIC RESPONSE ANALYSIS

### 4.5. Sample Autocorrelation Function

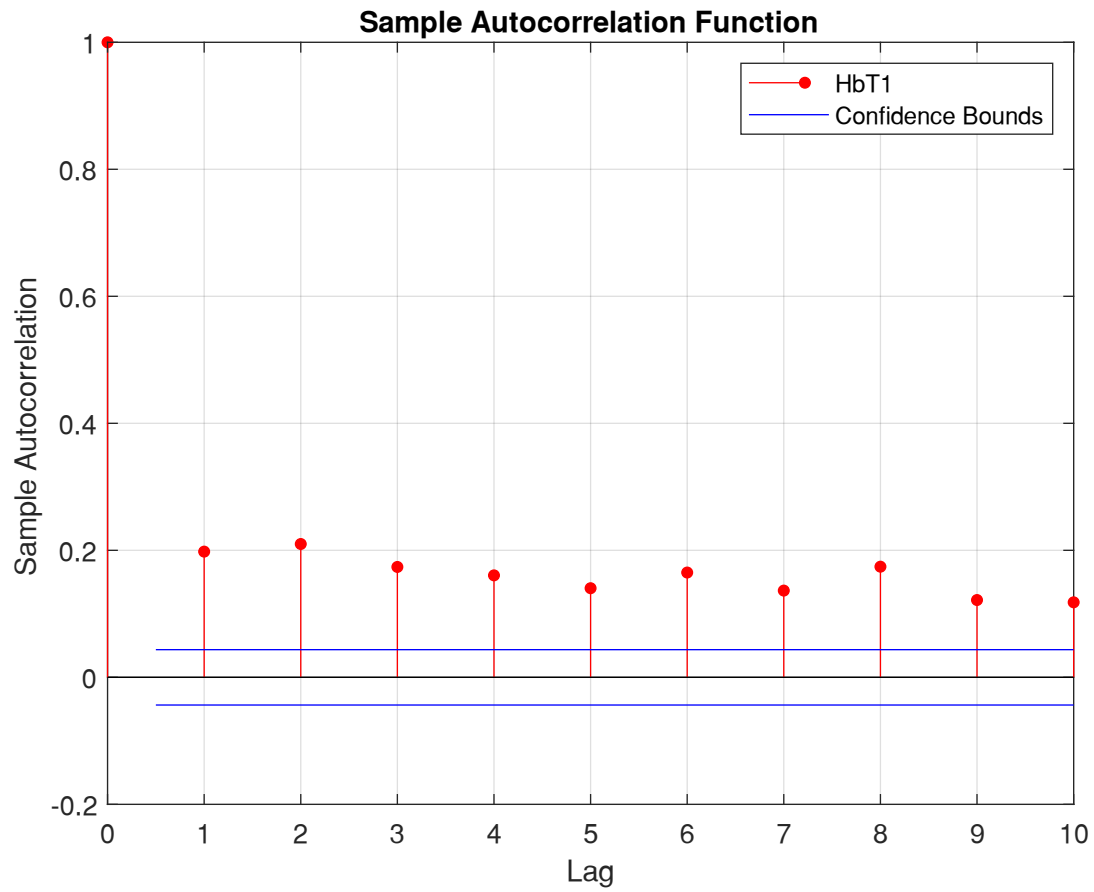

Figure S4.3. Sample autocorrelation function of HbT1



#### 4.6. Sample Partial Autocorrelation Function

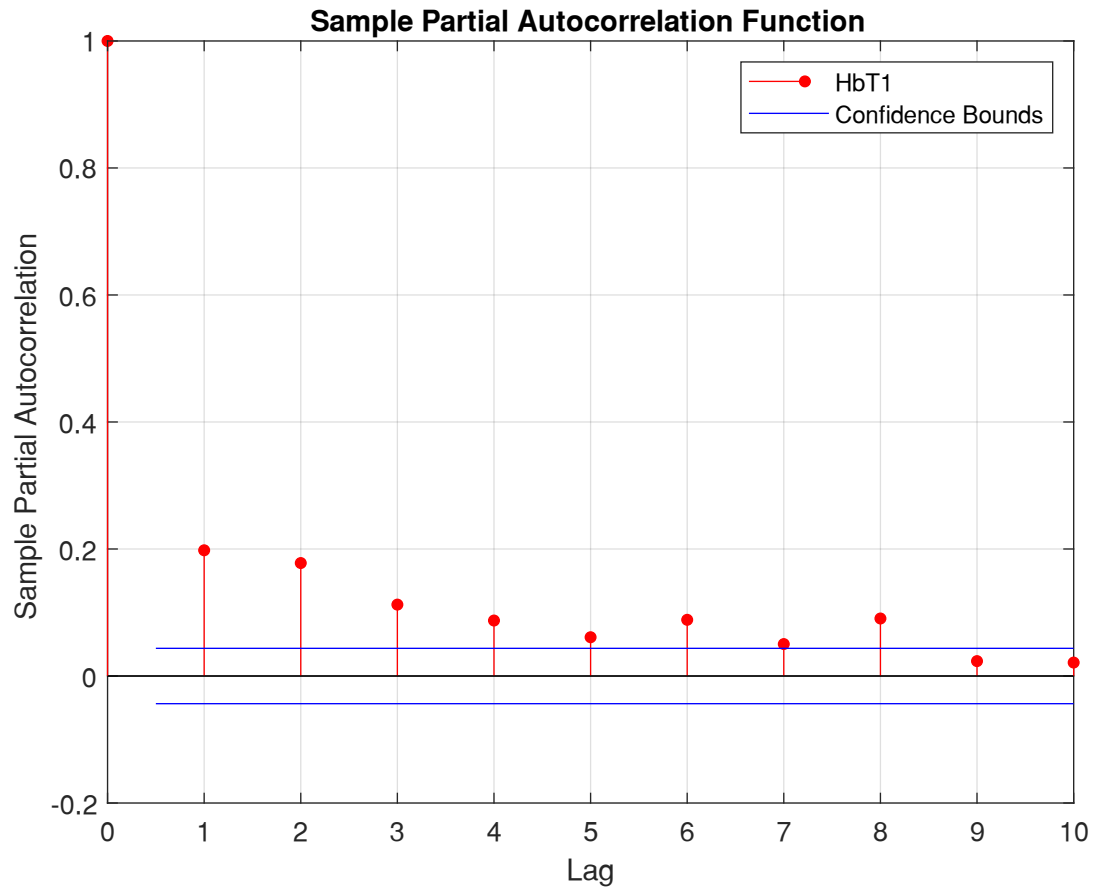

Figure S4.4. Sample partial autocorrelation function of HbT1

#### 4.7. Augmented Dickey-Fuller Test

Null Hypothesis: HbT1 contains a unit root

$$y_t = c + \delta t + \phi y_{t-1} + \beta_1 \Delta y_{t-1} + \dots + \beta_p \Delta y_{t-p} + \varepsilon_t$$

$$H_0 : \phi = 1$$

$$H_a : \phi < 1$$

**Table S4.5. Test Parameters**

|   | Lags | Model | Test Statistic | Significance Level |
|---|------|-------|----------------|--------------------|
| 1 | 0    | AR    | t1             | 0.025              |
| 2 | 1    | AR    | t1             | 0.025              |

**Table S4.6. Test Results**

|   | Null Rejected | P-Value   | Test Statistic | Critical Value |
|---|---------------|-----------|----------------|----------------|
| 1 | true          | 0.0029907 | -3.0472        | -2.2297        |
| 2 | false         | 0.076229  | -1.7494        | -2.2297        |

## 5.ARIMA(8,0,0) Model (Gaussian Distribution) (AR\_HbT1)

Autoregressive model of time series HbT1 with the following equation:

$$(1 - \phi_1 L - \dots - \phi_8 L^8) y_t = c + \varepsilon_t$$

### 5.1. Model Estimation

**Table S5.1. Estimation Results**

| Parameter | Value     | Standard Error | t Statistic | P-Value     |
|-----------|-----------|----------------|-------------|-------------|
| Constant  | 0.21416   | 0.021149       | 10.1261     | 4.2299e-24  |
| AR{1}     | 0.11361   | 0.022018       | 5.1598      | 2.4723e-07  |
| AR{2}     | 0.12308   | 0.021069       | 5.8417      | 5.1674e-09  |
| AR{3}     | 0.075612  | 0.022939       | 3.2963      | 0.00097978  |
| AR{4}     | 0.057032  | 0.021642       | 2.6352      | 0.0084095   |
| AR{5}     | 0.03634   | 0.022088       | 1.6453      | 0.099918    |
| AR{6}     | 0.070459  | 0.021567       | 3.267       | 0.001087    |
| AR{7}     | 0.039795  | 0.021849       | 1.8214      | 0.06855     |
| AR{8}     | 0.09124   | 0.021533       | 4.2372      | 2.2633e-05  |
| Variance  | 0.0028686 | 9.1648e-05     | 31.3008     | 4.5548e-215 |

**Table S5.2. Goodness of Fit**

|     |            |
|-----|------------|
| AIC | -6331.7778 |
| BIC | -6275.2904 |

## 5.2. Residual Quantile-Quantile plot

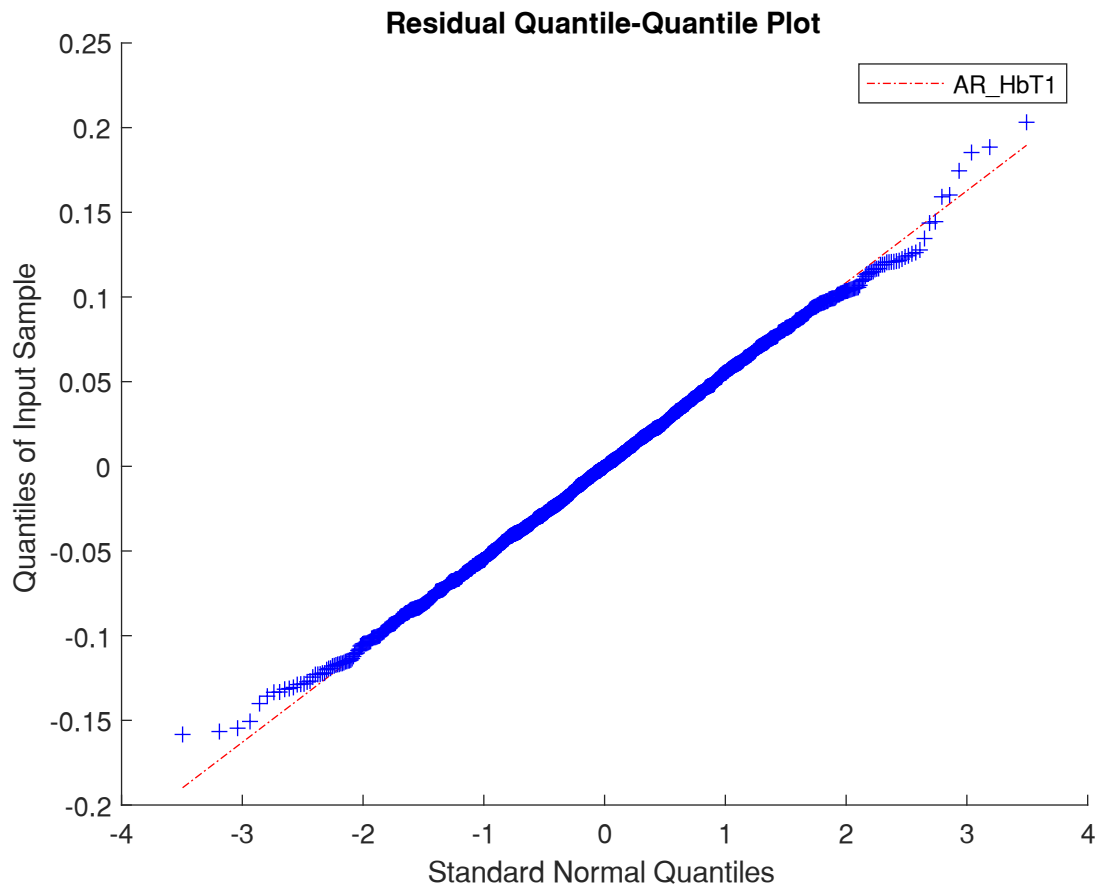

Figure S5.1. Quantile-quantile plot of the residuals of model AR\_HbT1.

### 5.3. Residual Sample Autocorrelation Function

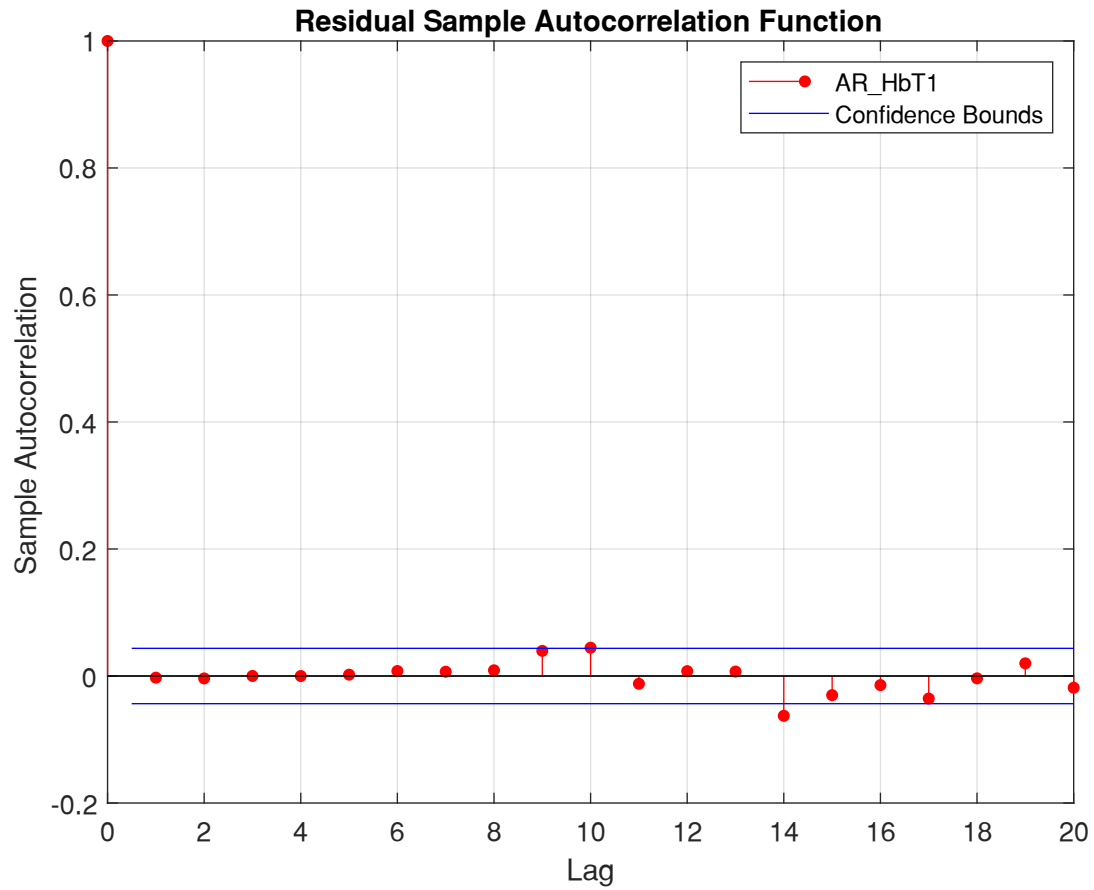

Figure S5.2. Sample autocorrelation function of the residuals of AR\_HbT1

#### 5.4. Ljung-Box Q-Test

Null Hypothesis: The first  $m$  autocorrelations of the residuals of AR\_HbT1 are jointly 0

$$H_0 : \rho_1 = \rho_2 = \dots = \rho_m = 0$$

$$H_a : \rho_j \neq 0, j \in 1, \dots, m$$

**Table S5.3. Test Parameters**

|   | Lags | DOF | Significance Level |
|---|------|-----|--------------------|
| 1 | 10   | 10  | 0.025              |

**Table S5.4. Test Results**

|   | Null Rejected | P-Value | Test Statistic | Critical Value |
|---|---------------|---------|----------------|----------------|
| 1 | false         | 0.63155 | 7.9723         | 20.4832        |

## PUPIL DILATION ANALYSIS

### 5.5. Sample Autocorrelation Function

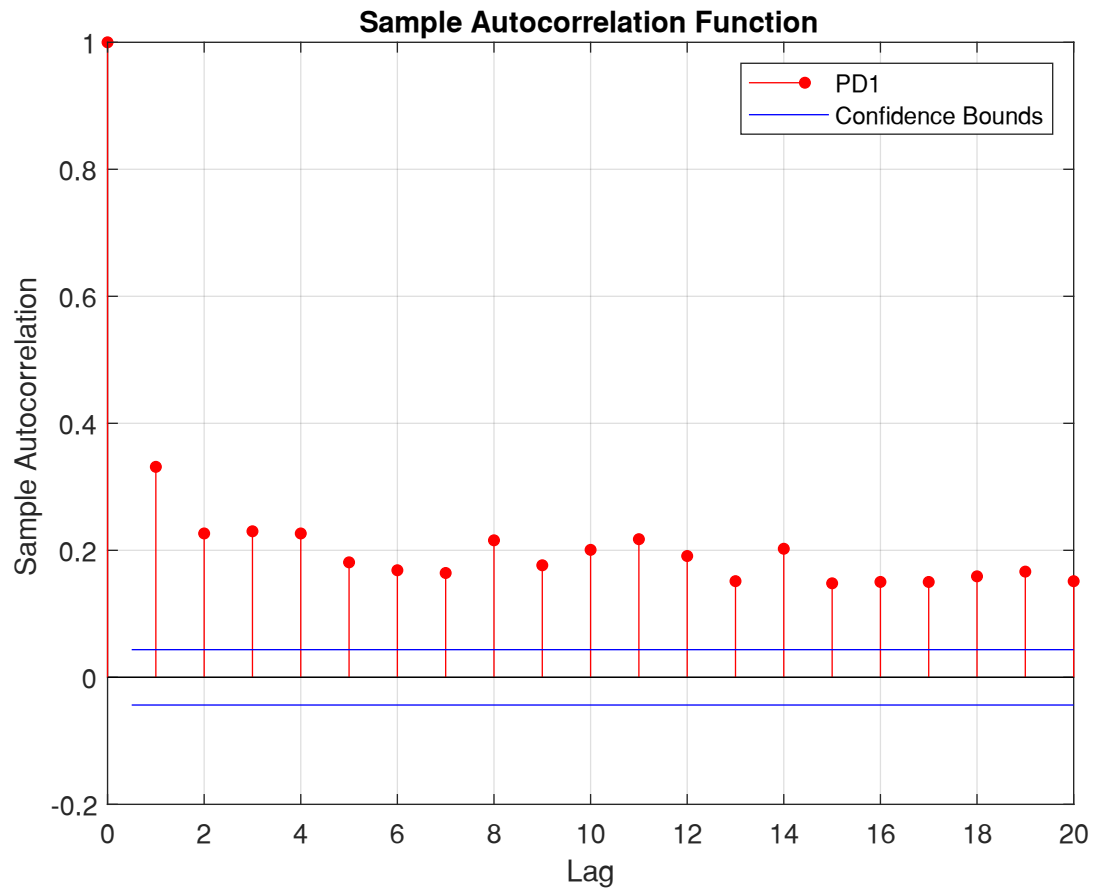

Figure S5.3. Sample autocorrelation function of PD1

## 5.6. Sample Partial Autocorrelation Function

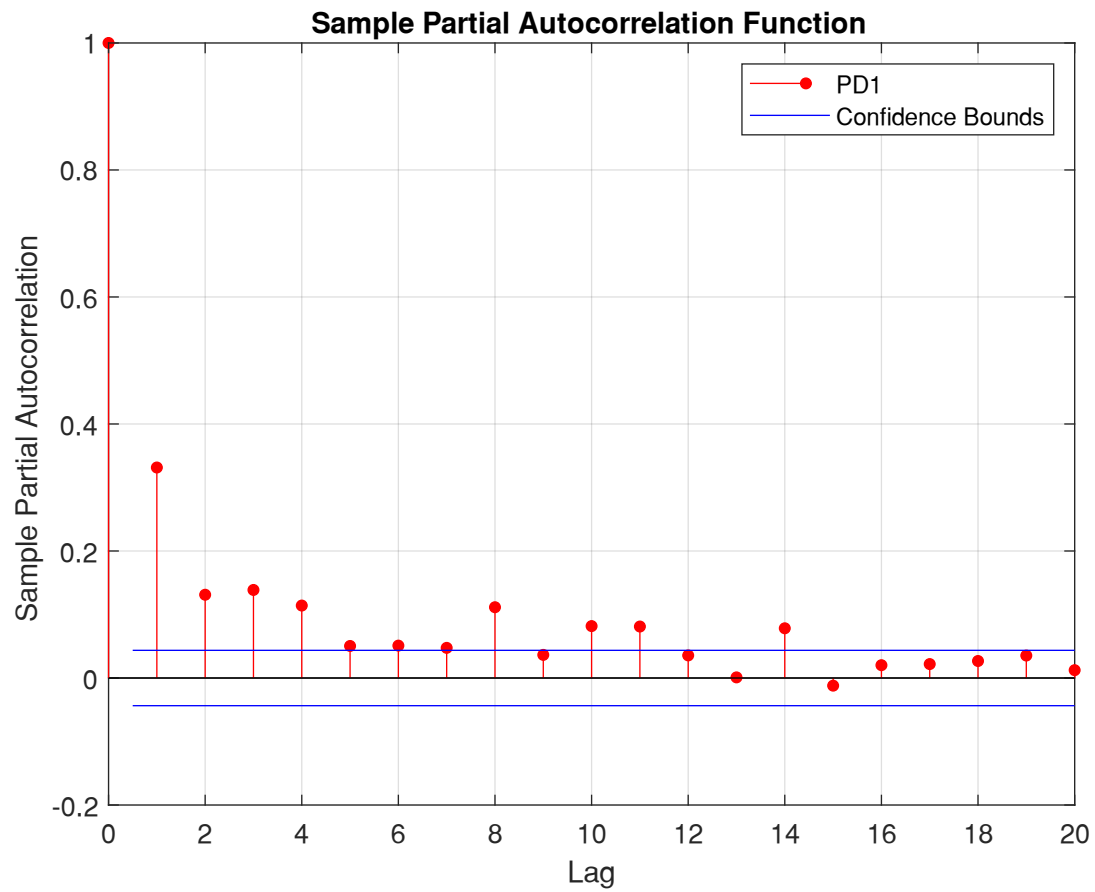

Figure S5.4. Sample partial autocorrelation function of PD1



## 5.7. Augmented Dickey-Fuller Test

Null Hypothesis: PD1 contains a unit root

$$y_t = c + \delta t + \phi y_{t-1} + \beta_1 \Delta y_{t-1} + \dots + \beta_p \Delta y_{t-p} + \varepsilon_t$$

$$H_0 : \phi = 1$$

$$H_a : \phi < 1$$

**Table S5.5. Test Parameters**

|   | Lags | Model | Test Statistic | Significance Level |
|---|------|-------|----------------|--------------------|
| 1 | 0    | AR    | t1             | 0.025              |
| 2 | 1    | AR    | t1             | 0.025              |

**Table S5.6. Test Results**

|   | Null Rejected | P-Value   | Test Statistic | Critical Value |
|---|---------------|-----------|----------------|----------------|
| 1 | true          | 0.0039226 | -2.9338        | -2.2297        |
| 2 | false         | 0.057636  | -1.8788        | -2.2297        |

## 6.ARIMA(7,0,0) Model (Gaussian Distribution) (AR\_PD1)

Autoregressive model of time series PD1 with the following equation:

$$(1 - \phi_1 L - \dots - \phi_7 L^7) y_t = c + \varepsilon_t$$

### 6.1. Model Estimation

**Table S6.1. Estimation Results**

| Parameter | Value     | Standard Error | t Statistic | P-Value    |
|-----------|-----------|----------------|-------------|------------|
| Constant  | 0.32607   | 0.031601       | 10.3185     | 5.8131e-25 |
| AR{1}     | 0.24325   | 0.021655       | 11.2329     | 2.8098e-29 |
| AR{2}     | 0.068397  | 0.027074       | 2.5263      | 0.011528   |
| AR{3}     | 0.093924  | 0.026064       | 3.6036      | 0.00031389 |
| AR{4}     | 0.092795  | 0.020917       | 4.4363      | 9.1506e-06 |
| AR{5}     | 0.034481  | 0.031067       | 1.1099      | 0.26705    |
| AR{6}     | 0.039357  | 0.031843       | 1.236       | 0.21647    |
| AR{7}     | 0.047477  | 0.03203        | 1.4823      | 0.13827    |
| Variance  | 0.0075954 | 0.00013306     | 57.0816     | 0          |

**Table S6.2. Goodness of Fit**

|     |            |
|-----|------------|
| AIC | -4283.1631 |
| BIC | -4232.3202 |

## 6.2. Residual Quantile-Quantile plot

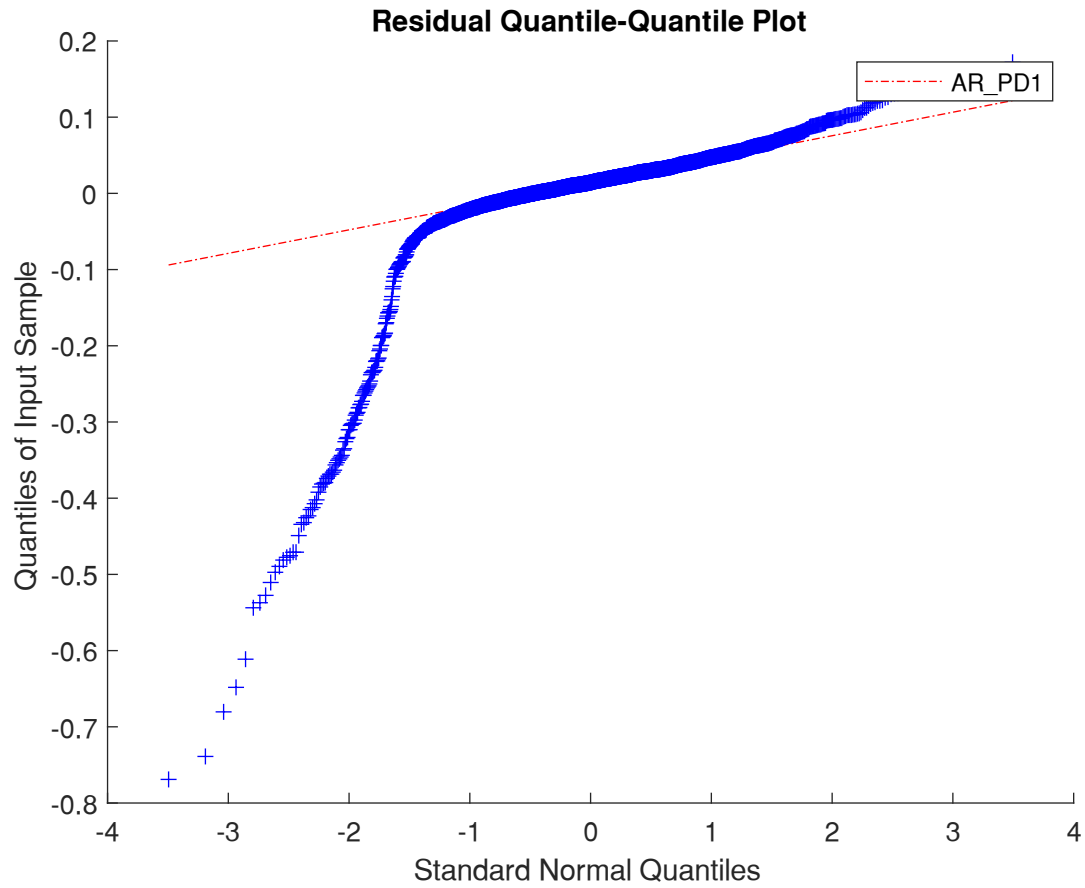

Figure S6.1. Quantile-quantile plot of the residuals of model AR\_PD1.

### 6.3. Residual Sample Autocorrelation Function

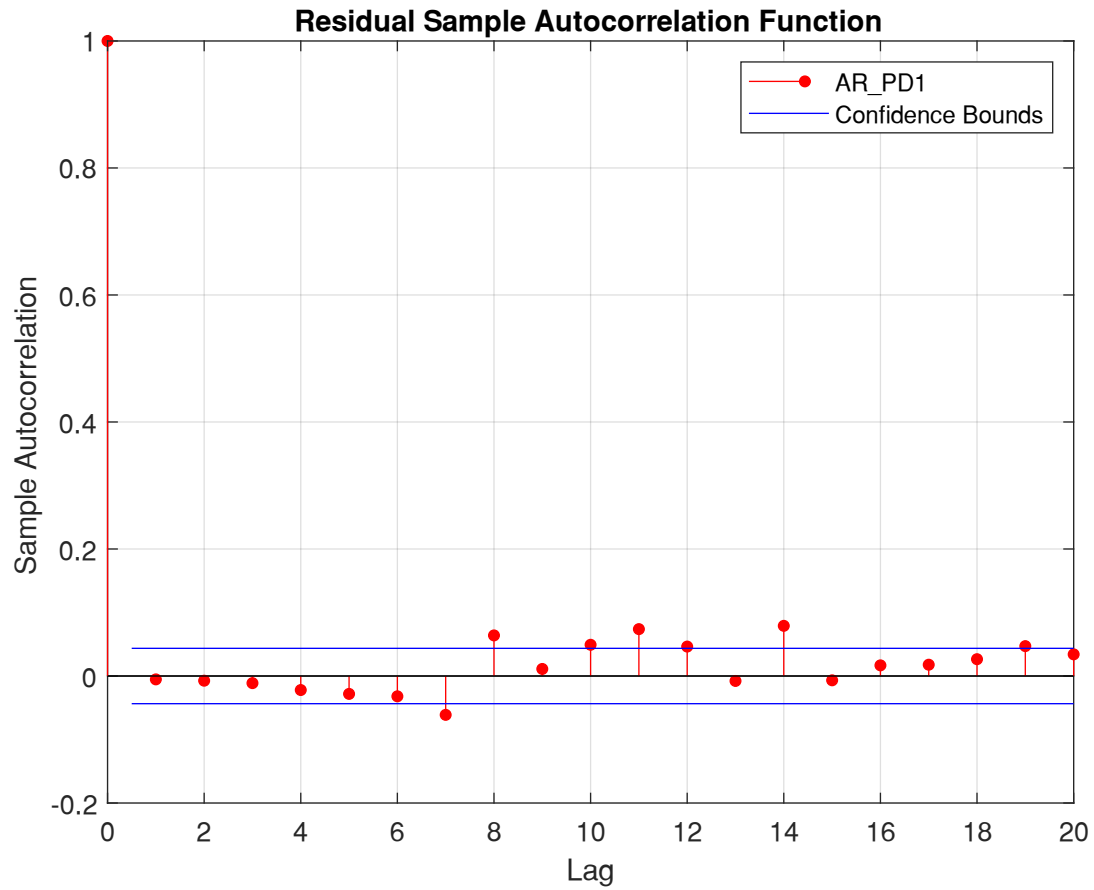

Figure S6.2. Sample autocorrelation function of the residuals of AR\_PD1

6.4. Ljung-Box Q-Test

Null Hypothesis: The first m autocorrelations of the residuals of AR\_PD1 are jointly 0

$$H_0 : \rho_1 = \rho_2 = \dots = \rho_m = 0$$
$$H_a : \rho_j \neq 0, j \in 1, \dots, m$$

Table S6.3. Test Parameters

|   | Lags | DOF | Significance Level |
|---|------|-----|--------------------|
| 1 | 10   | 10  | 0.025              |

Table S6.4. Test Results

|   | Null Rejected | P-Value  | Test Statistic | Critical Value |
|---|---------------|----------|----------------|----------------|
| 1 | true          | 0.002372 | 27.2561        | 20.4832        |

3. GCTest ‘blockwise’

| H0                                        | Decision    | Distribution | Statistic | PValue     | CriticalValue |
|-------------------------------------------|-------------|--------------|-----------|------------|---------------|
| "Exclude lagged tDCS in HbT,PD equations" | "Reject H0" | "F(34,2024)" | 2.2734    | 4.1574e-05 | 1.4353        |
| H0                                        | Decision    | Distribution | Statistic | PValue     | CriticalValue |
| "Exclude lagged tDCS in HbT equations"    | "Reject H0" | "F(17,2024)" | 2.3424    | 0.0014826  | 1.6278        |
| H0                                        | Decision    | Distribution | Statistic | PValue     | CriticalValue |
| "Exclude lagged tDCS in PD equations"     | "Reject H0" | "F(17,2024)" | 2.1752    | 0.0036032  | 1.6278        |

## SUBJECT 4:

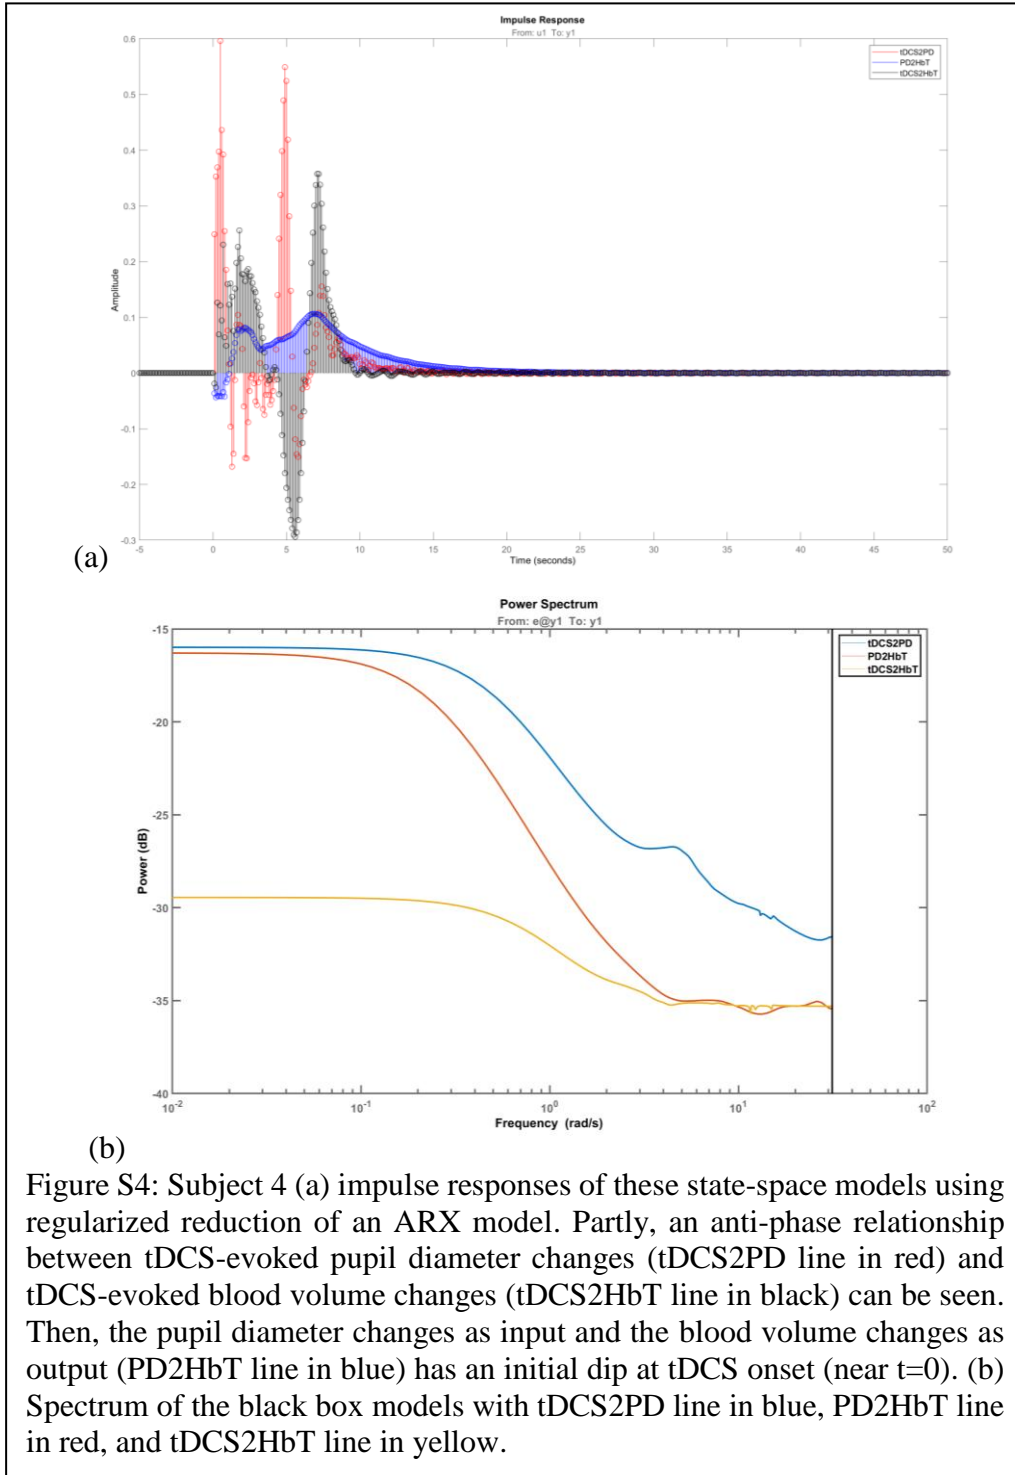

## HEMODYNAMIC RESPONSE ANALYSIS

### 6.5. Sample Autocorrelation Function

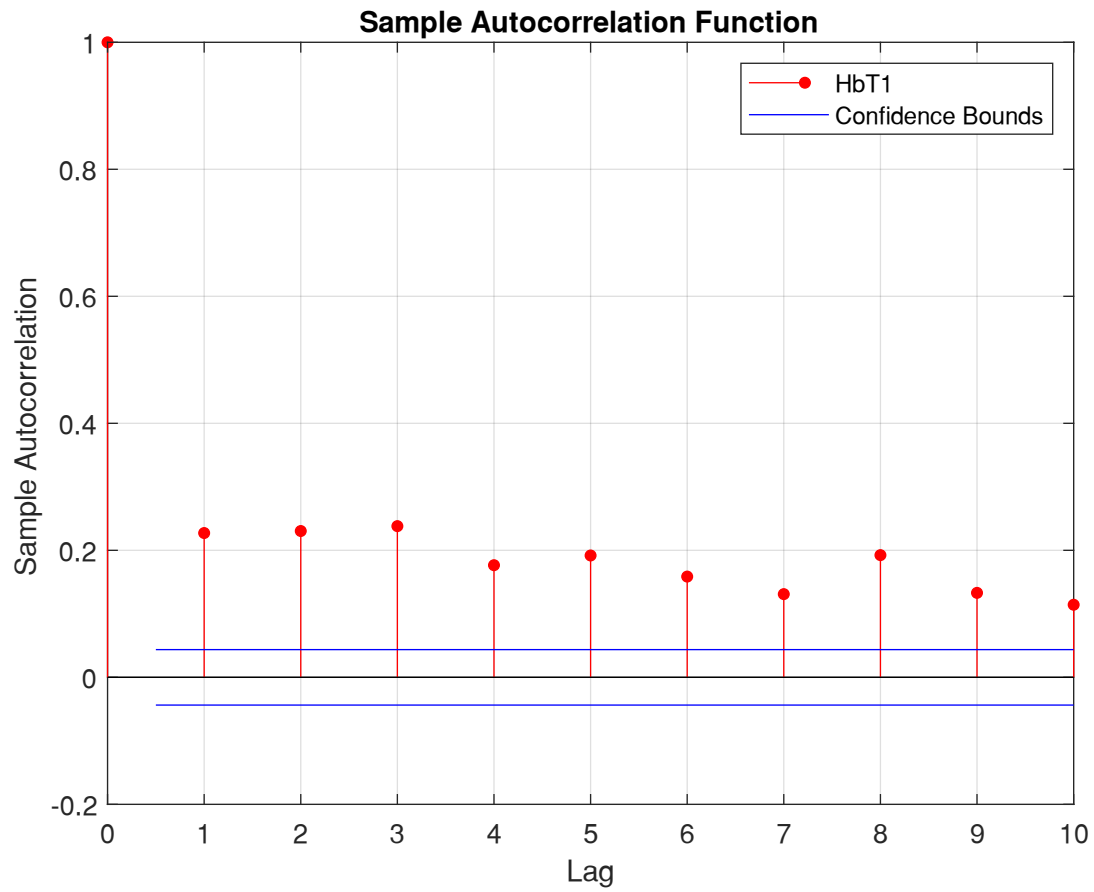

Figure S6.3. Sample autocorrelation function of HbT1

## 6.6. Sample Partial Autocorrelation Function

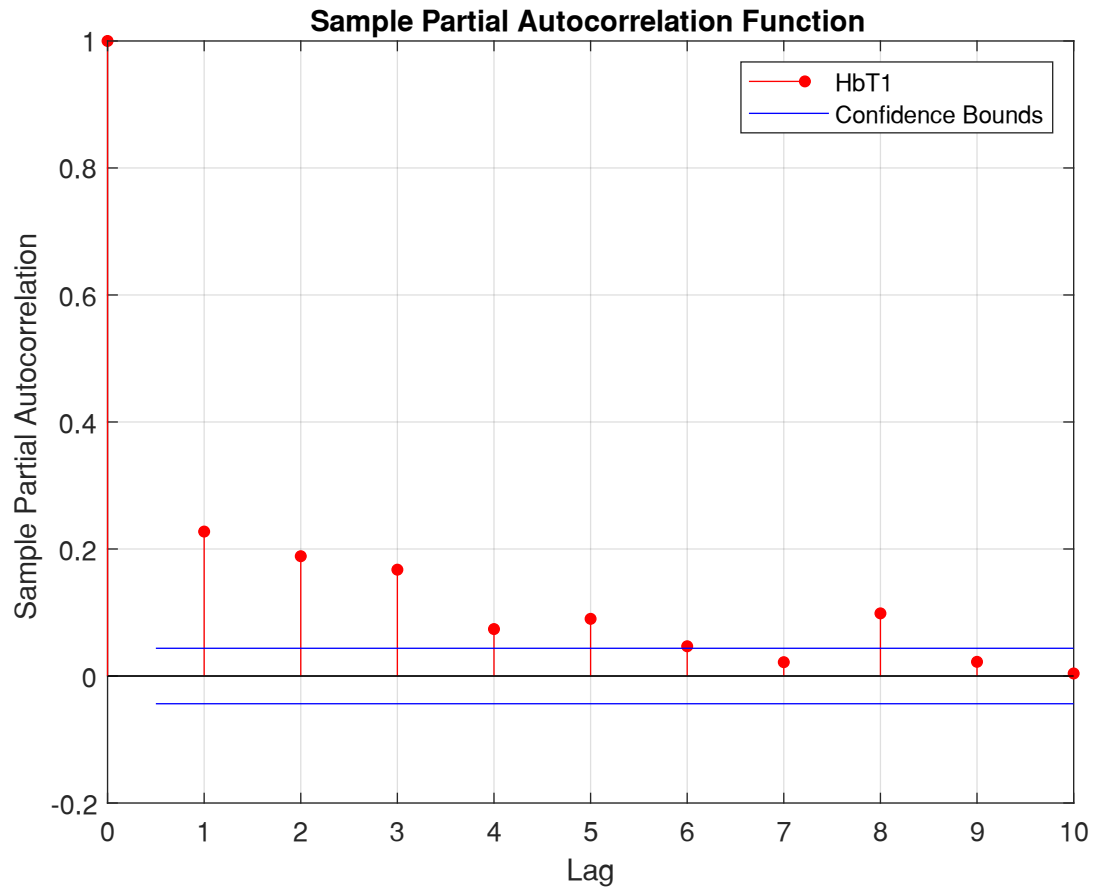

Figure S6.4. Sample partial autocorrelation function of HbT1



## 6.7. Augmented Dickey-Fuller Test

Null Hypothesis: HbT1 contains a unit root

$$y_t = c + \delta t + \phi y_{t-1} + \beta_1 \Delta y_{t-1} + \dots + \beta_p \Delta y_{t-p} + \varepsilon_t$$

$$H_0 : \phi = 1$$

$$H_a : \phi < 1$$

**Table S6.5. Test Parameters**

|   | Lags | Model | Test Statistic | Significance Level |
|---|------|-------|----------------|--------------------|
| 1 | 0    | AR    | t1             | 0.025              |
| 2 | 1    | AR    | t1             | 0.025              |

**Table S6.6. Test Results**

|   | Null Rejected | P-Value   | Test Statistic | Critical Value |
|---|---------------|-----------|----------------|----------------|
| 1 | true          | 0.0030432 | -3.0408        | -2.2297        |
| 2 | false         | 0.075324  | -1.7549        | -2.2297        |

## 7.ARIMA(8,0,0) Model (Gaussian Distribution) (AR\_HbT1)

Autoregressive model of time series HbT1 with the following equation:

$$(1 - \phi_1 L - \dots - \phi_8 L^8) y_t = c + \varepsilon_t$$

### 7.1. Model Estimation

**Table S7.1. Estimation Results**

| Parameter | Value   | Standard Error | t Statistic | P-Value    |
|-----------|---------|----------------|-------------|------------|
| Constant  | 0.20393 | 0.020071       | 10.1601     | 2.9875e-24 |

|          |           |            |         |             |
|----------|-----------|------------|---------|-------------|
| AR{1}    | 0.12647   | 0.021665   | 5.8377  | 5.2922e-09  |
| AR{2}    | 0.12318   | 0.023081   | 5.3368  | 9.4627e-08  |
| AR{3}    | 0.12703   | 0.021535   | 5.8988  | 3.6623e-09  |
| AR{4}    | 0.0473    | 0.022711   | 2.0827  | 0.037278    |
| AR{5}    | 0.06769   | 0.022794   | 2.9696  | 0.0029821   |
| AR{6}    | 0.031609  | 0.021644   | 1.4604  | 0.14417     |
| AR{7}    | 0.0084907 | 0.021697   | 0.39134 | 0.69555     |
| AR{8}    | 0.099317  | 0.021107   | 4.7053  | 2.5346e-06  |
| Variance | 0.0031003 | 9.5729e-05 | 32.386  | 4.3177e-230 |

**Table S7.2. Goodness of Fit**

|     |            |
|-----|------------|
| AIC | -6144.727  |
| BIC | -6088.2778 |

## 7.2. Residual Quantile-Quantile plot

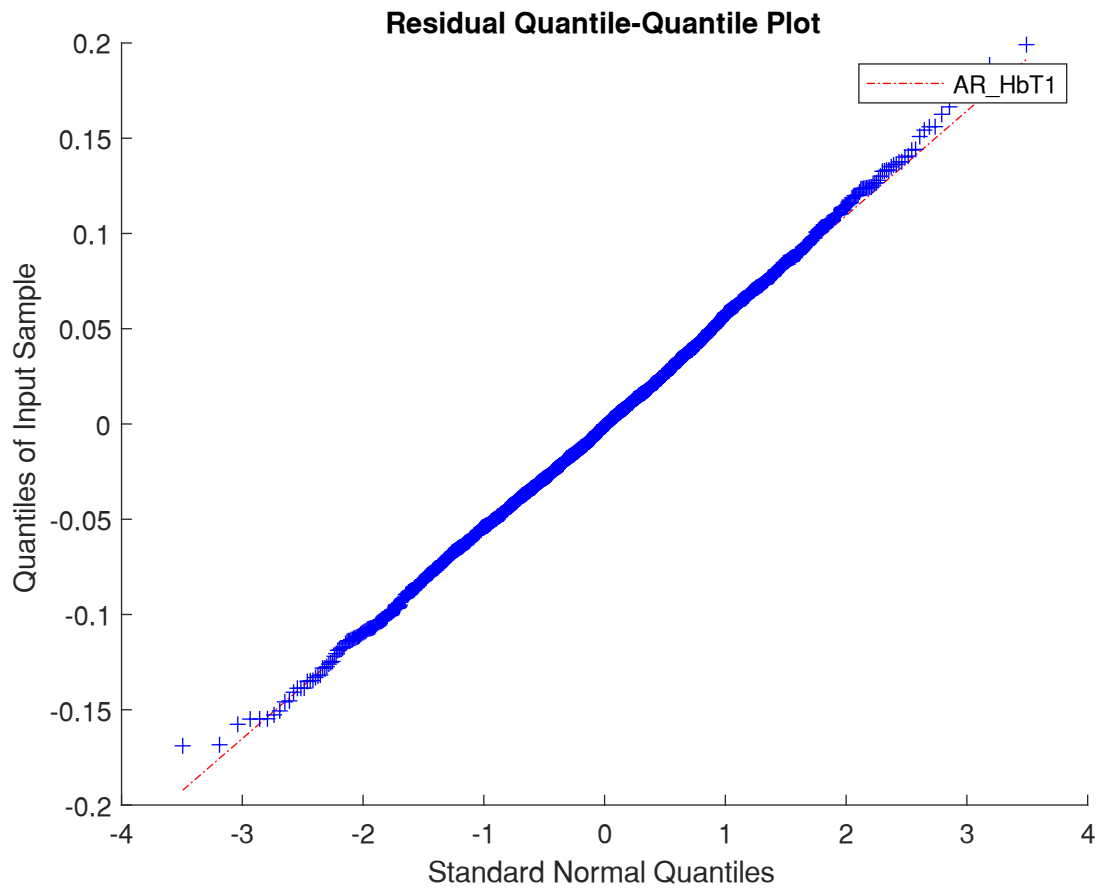

Figure S7.1. Quantile-quantile plot of the residuals of model AR\_HbT1.

### 7.3. Residual Sample Autocorrelation Function

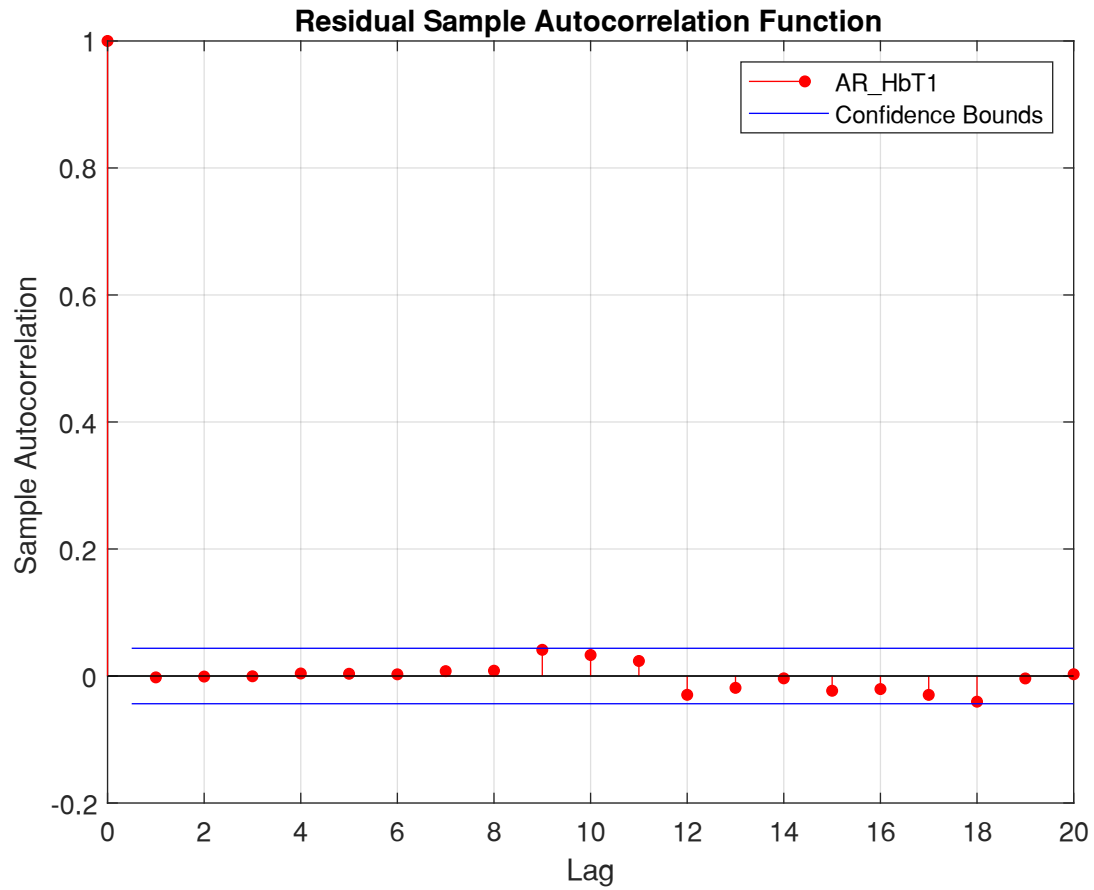

Figure S7.2. Sample autocorrelation function of the residuals of AR\_HbT1

#### 7.4. Ljung-Box Q-Test

Null Hypothesis: The first m autocorrelations of the residuals of AR\_HbT1 are jointly 0

$$H_0 : \rho_1 = \rho_2 = \dots = \rho_m = 0$$

$$H_a : \rho_j \neq 0, j \in 1, \dots, m$$

**Table S7.3. Test Parameters**

|   | Lags | DOF | Significance Level |
|---|------|-----|--------------------|
| 1 | 10   | 10  | 0.025              |

**Table S7.4. Test Results**

|   | Null Rejected | P-Value | Test Statistic | Critical Value |
|---|---------------|---------|----------------|----------------|
| 1 | false         | 0.794   | 6.2481         | 20.4832        |

## PUPIL DILATION ANALYSIS

### 7.5. Sample Autocorrelation Function

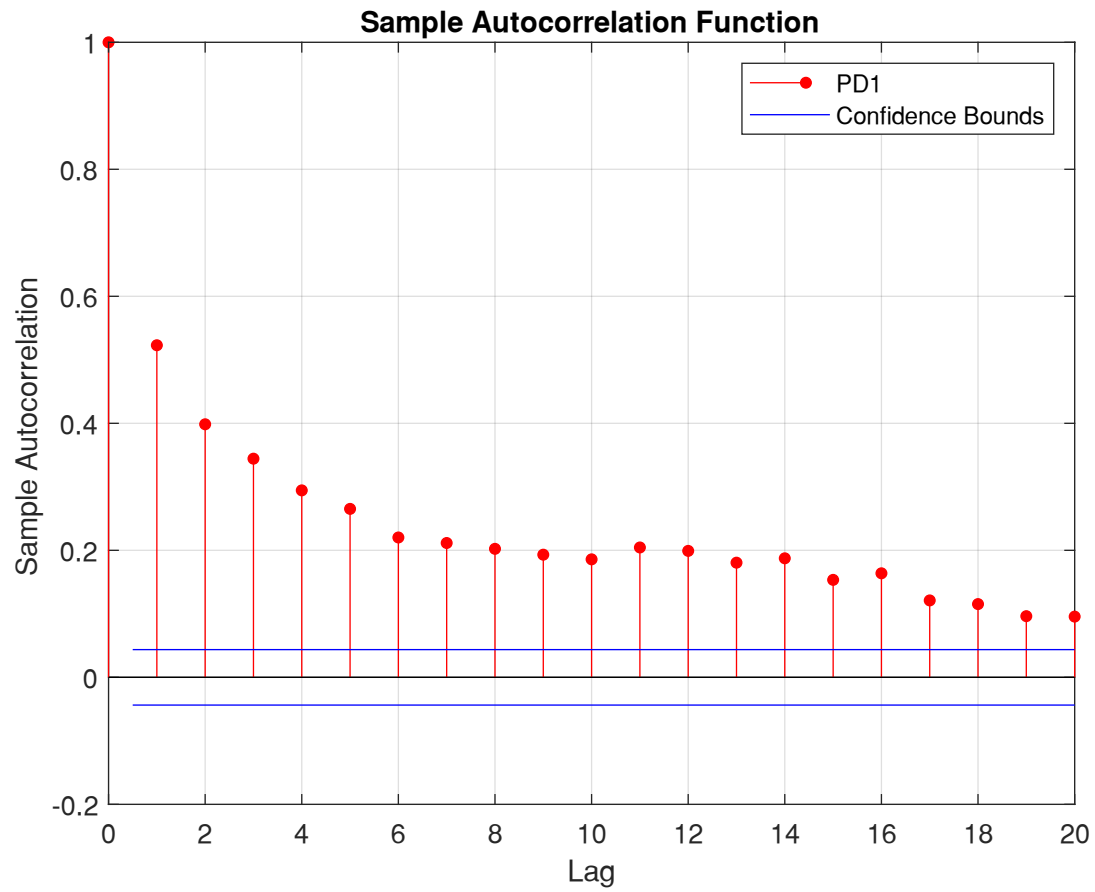

Figure S7.3. Sample autocorrelation function of PD1

## 7.6. Sample Partial Autocorrelation Function

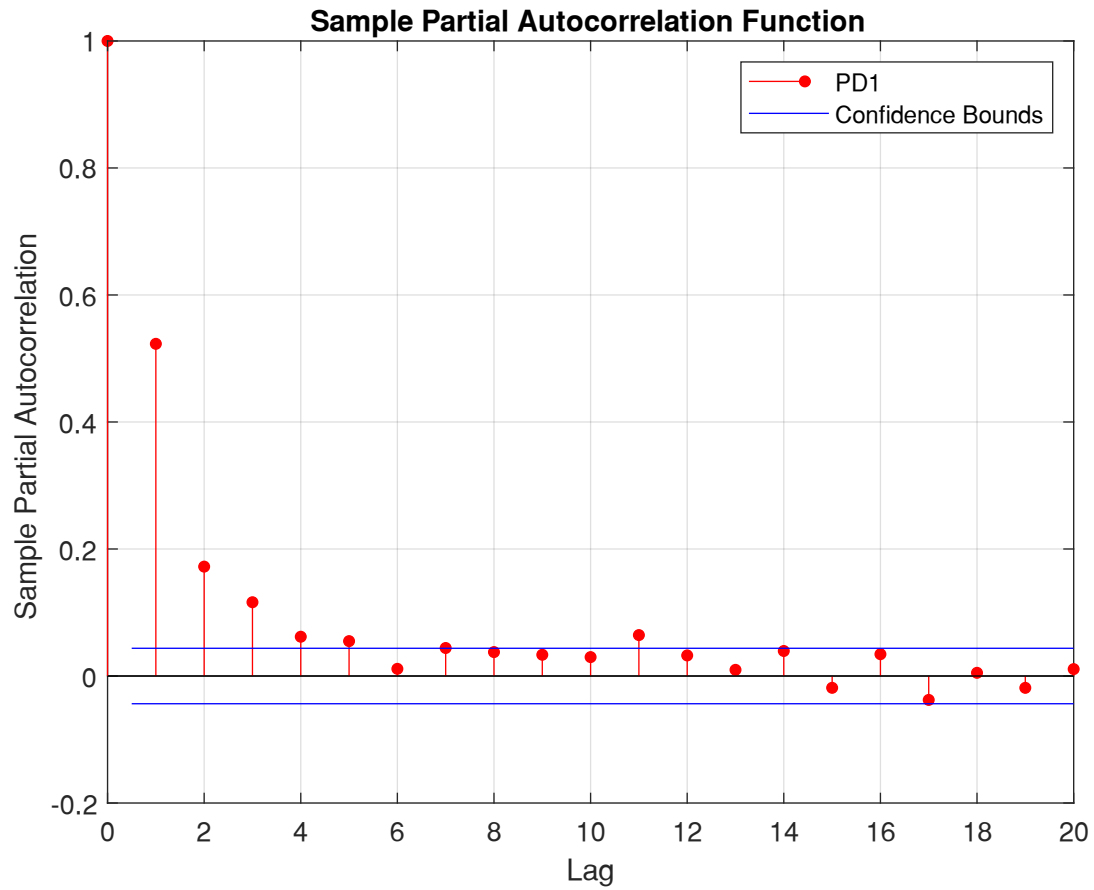

Figure S7.4. Sample partial autocorrelation function of PD1

## 7.7. Augmented Dickey-Fuller Test

Null Hypothesis: PD1 contains a unit root

$$y_t = c + \delta t + \phi y_{t-1} + \beta_1 \Delta y_{t-1} + \dots + \beta_p \Delta y_{t-p} + \varepsilon_t$$

$$H_0 : \phi = 1$$

$$H_a : \phi < 1$$

**Table S7.5. Test Parameters**

|   | Lags | Model | Test Statistic | Significance Level |
|---|------|-------|----------------|--------------------|
| 1 | 0    | AR    | t1             | 0.025              |
| 2 | 1    | AR    | t1             | 0.025              |
| 3 | 2    | AR    | t1             | 0.025              |

**Table S7.6. Test Results**

|   | Null Rejected | P-Value   | Test Statistic | Critical Value |
|---|---------------|-----------|----------------|----------------|
| 1 | true          | 0.001     | -3.9264        | -2.2297        |
| 2 | true          | 0.0076111 | -2.6806        | -2.2297        |
| 3 | false         | 0.034412  | -2.1012        | -2.2297        |



## 8.ARIMA(7,0,0) Model (Gaussian Distribution) (AR\_PD1)

Autoregressive model of time series PD1 with the following equation:

$$(1 - \phi_1 L - \dots - \phi_7 L^7) y_t = c + \varepsilon_t$$

### 8.1. Model Estimation

**Table S8.1. Estimation Results**

| Parameter | Value      | Standard Error | t Statistic | P-Value     |
|-----------|------------|----------------|-------------|-------------|
| Constant  | 0.21007    | 0.018614       | 11.2853     | 1.5517e-29  |
| AR{1}     | 0.40136    | 0.01345        | 29.8408     | 1.1563e-195 |
| AR{2}     | 0.1068     | 0.020085       | 5.3173      | 1.0533e-07  |
| AR{3}     | 0.081733   | 0.020672       | 3.9538      | 7.6917e-05  |
| AR{4}     | 0.03467    | 0.023506       | 1.475       | 0.14022     |
| AR{5}     | 0.045591   | 0.020905       | 2.1809      | 0.029191    |
| AR{6}     | -0.0064368 | 0.035389       | -0.18189    | 0.85567     |
| AR{7}     | 0.044098   | 0.026355       | 1.6733      | 0.094277    |
| Variance  | 0.011109   | 0.00020157     | 55.111      | 0           |

**Table S8.2. Goodness of Fit**

|     |            |
|-----|------------|
| AIC | -3469.175  |
| BIC | -3418.3664 |

## 8.2. Residual Quantile-Quantile plot

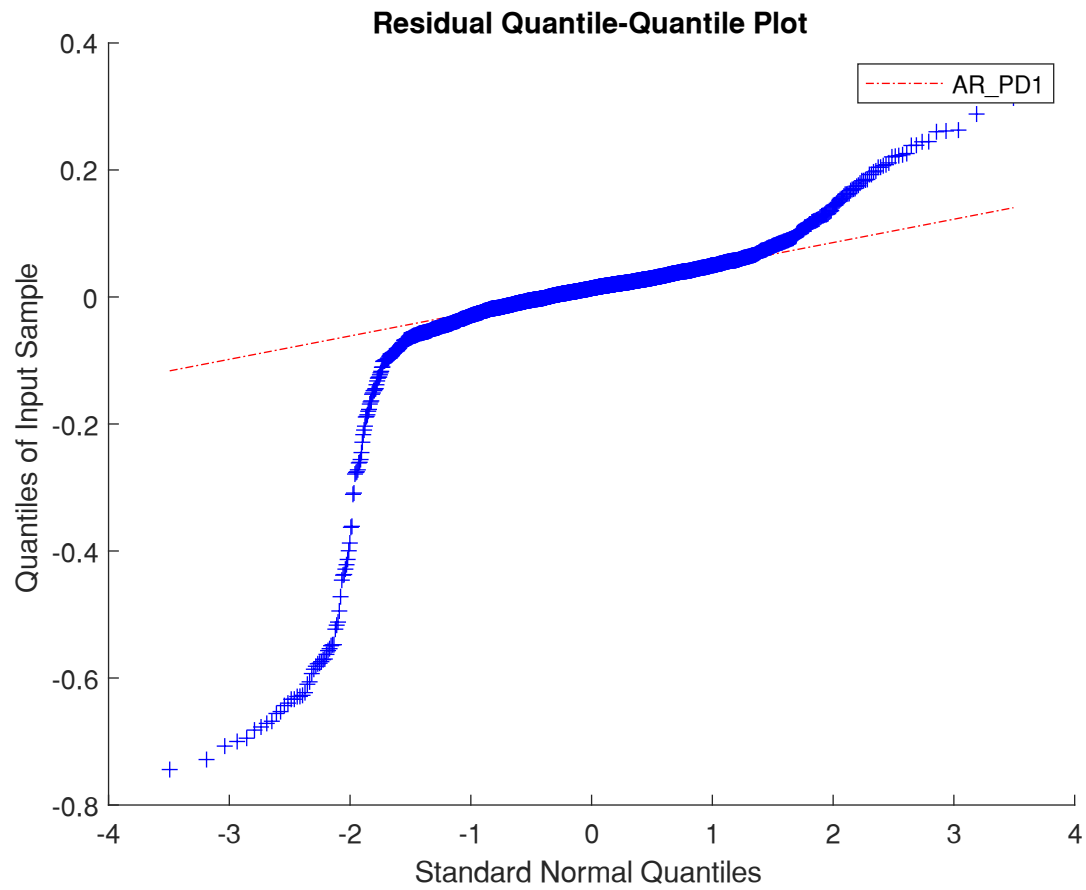

Figure S8.1. Quantile-quantile plot of the residuals of model AR\_PD1.

### 8.3. Residual Sample Autocorrelation Function

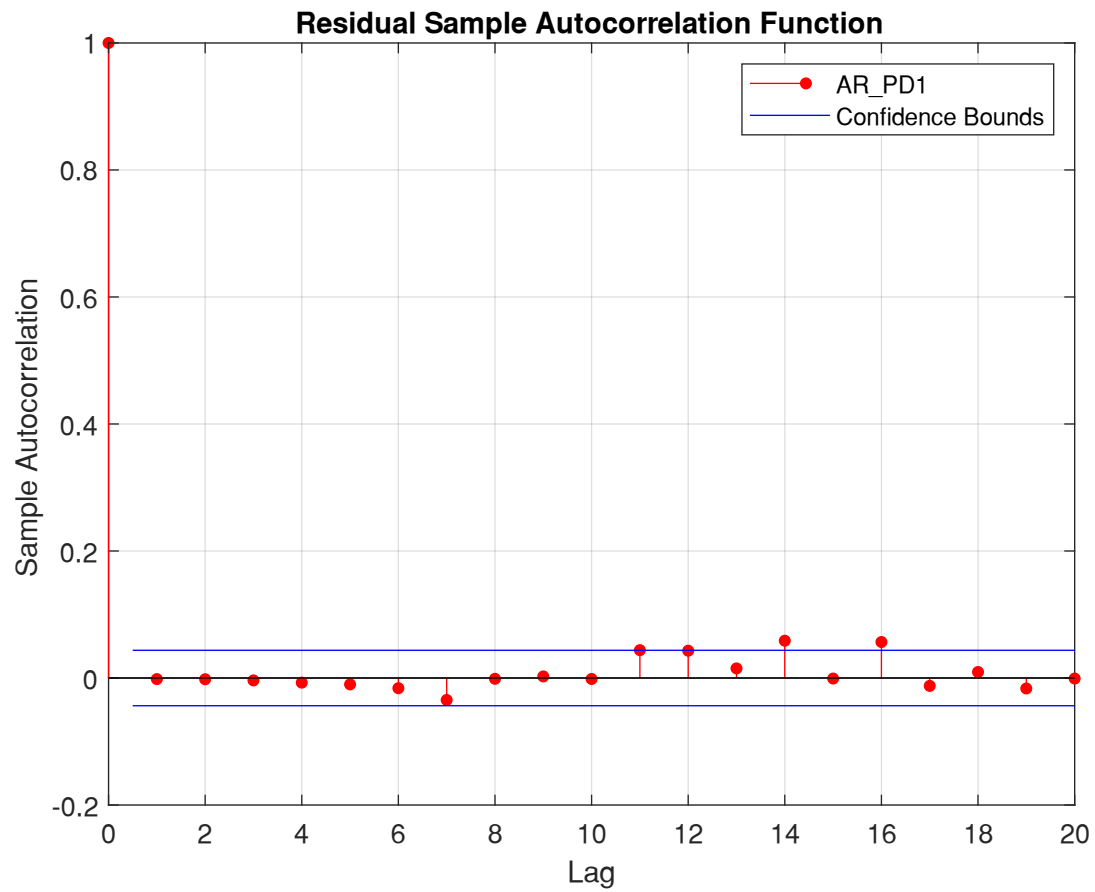

Figure S8.2. Sample autocorrelation function of the residuals of AR\_PD1

### 8.4. Ljung-Box Q-Test

Null Hypothesis: The first m autocorrelations of the residuals of AR\_PD1 are jointly 0

$$H_0 : \rho_1 = \rho_2 = \dots = \rho_m = 0$$

$$H_a : \rho_j \neq 0, j \in 1, \dots, m$$

**Table S8.3. Test Parameters**

|   | Lags | DOF | Significance Level |
|---|------|-----|--------------------|
| 1 | 10   | 10  | 0.025              |

**Table S8.4. Test Results**

|   | Null Rejected | P-Value | Test Statistic | Critical Value |
|---|---------------|---------|----------------|----------------|
| 1 | false         | 0.96867 | 3.4531         | 20.4832        |

### 3. GCTest 'blockwise'

| H0                                        | Decision    | Distribution | Statistic | PValue     | CriticalValue |
|-------------------------------------------|-------------|--------------|-----------|------------|---------------|
| "Exclude lagged tDCS in HbT,PD equations" | "Reject H0" | "F(36,2013)" | 2.0446    | 0.00026555 | 1.4226        |
| H0                                        | Decision    | Distribution | Statistic | PValue     | CriticalValue |
| "Exclude lagged tDCS in HbT equations"    | "Reject H0" | "F(18,2013)" | 1.9065    | 0.012024   | 1.609         |
| H0                                        | Decision    | Distribution | Statistic | PValue     | CriticalValue |
| "Exclude lagged tDCS in PD equations"     | "Reject H0" | "F(18,2013)" | 2.1702    | 0.0029907  | 1.609         |

## SUBJECT 5:

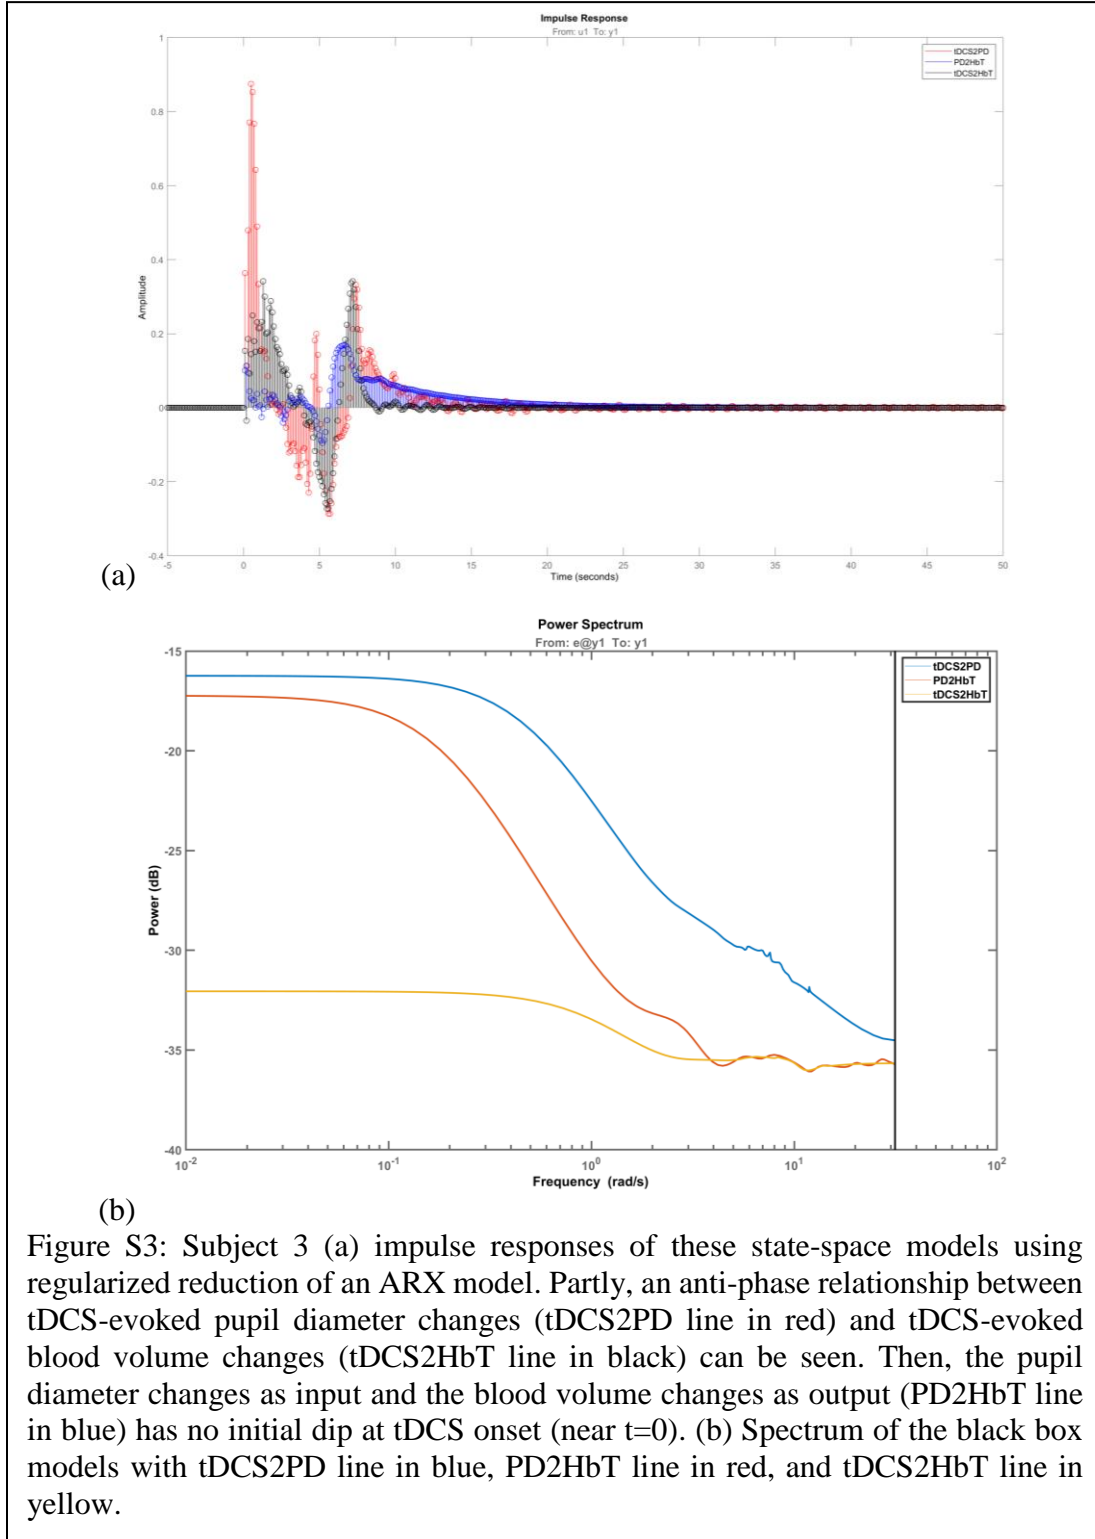

## HEMODYNAMIC RESPONSE ANALYSIS

### 8.5. Sample Autocorrelation Function

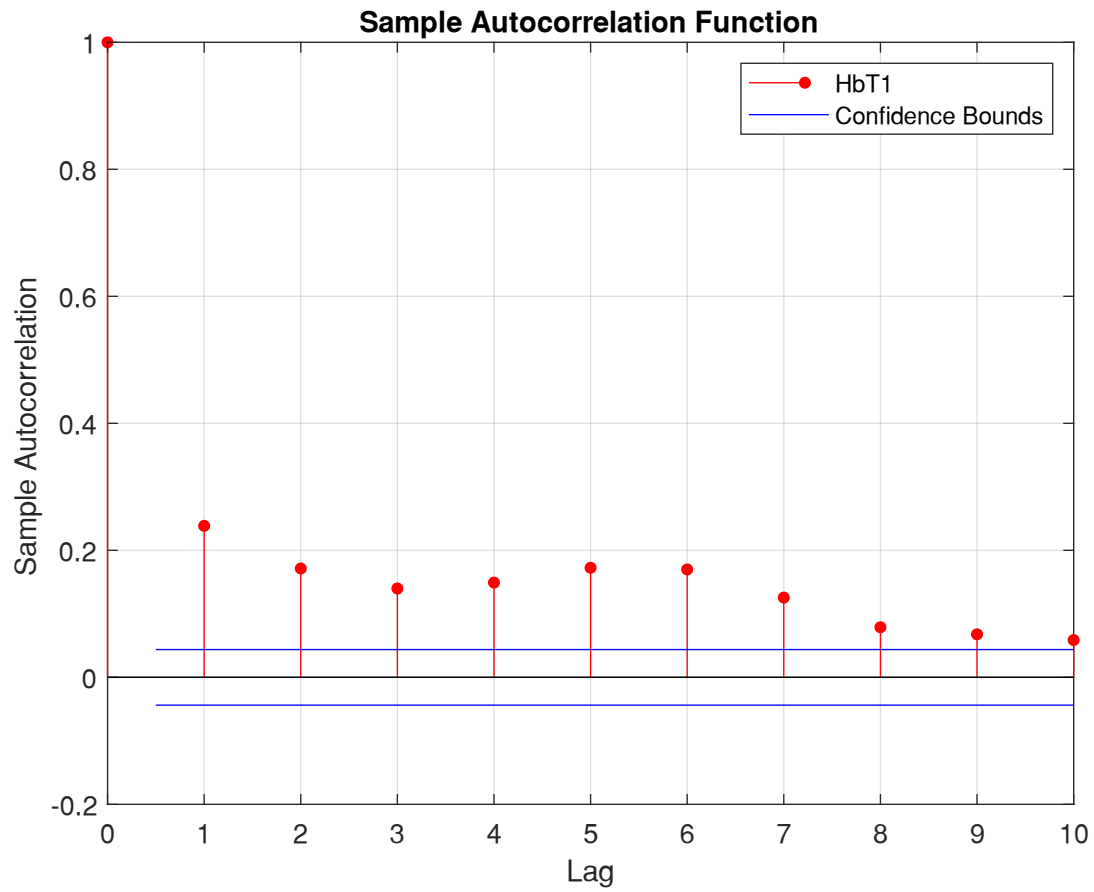

Figure 8.3. Sample autocorrelation function of HbT1

## 8.6. Sample Partial Autocorrelation Function

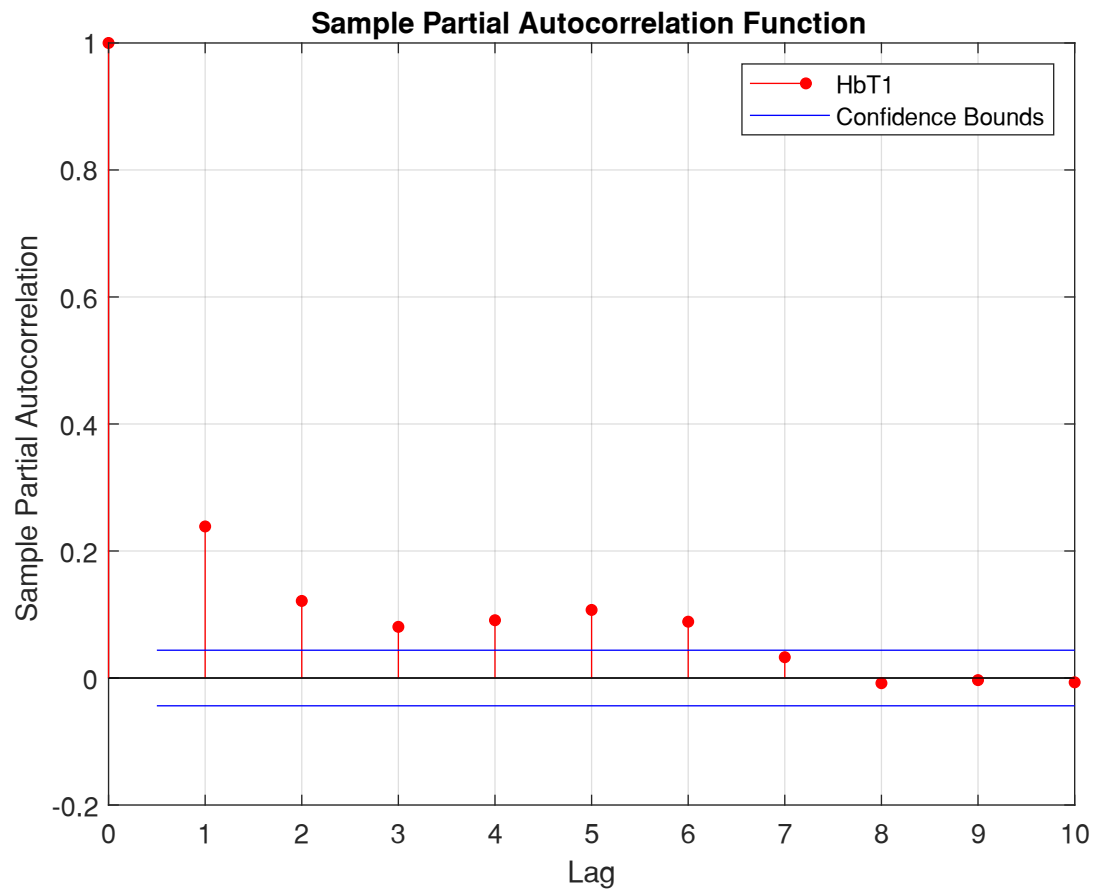

Figure 8.4. Sample partial autocorrelation function of HbT1

## 8.7. Augmented Dickey-Fuller Test

Null Hypothesis: HbT1 contains a unit root

$$y_t = c + \delta t + \phi y_{t-1} + \beta_1 \Delta y_{t-1} + \dots + \beta_p \Delta y_{t-p} + \varepsilon_t$$

$$H_0 : \phi = 1$$

$$H_a : \phi < 1$$

**Table 8.5. Test Parameters**

|   | Lags | Model | Test Statistic | Significance Level |
|---|------|-------|----------------|--------------------|
| 1 | 0    | AR    | t1             | 0.025              |
| 2 | 1    | AR    | t1             | 0.025              |

**Table 8.6. Test Results**

|   | Null Rejected | P-Value   | Test Statistic | Critical Value |
|---|---------------|-----------|----------------|----------------|
| 1 | true          | 0.0045342 | -2.8593        | -2.2297        |
| 2 | false         | 0.074558  | -1.7598        | -2.2297        |



## 9.ARIMA(8,0,0) Model (Gaussian Distribution) (AR\_HbT1)

Autoregressive model of time series HbT1 with the following equation:

$$(1 - \phi_1 L - \dots - \phi_8 L^8) y_t = c + \varepsilon_t$$

### 9.1. Model Estimation

**Table 9.1. Estimation Results**

| Parameter | Value      | Standard Error | t Statistic | P-Value     |
|-----------|------------|----------------|-------------|-------------|
| Constant  | 0.24299    | 0.021291       | 11.413      | 3.5998e-30  |
| AR{1}     | 0.17045    | 0.021997       | 7.7488      | 9.277e-15   |
| AR{2}     | 0.079595   | 0.022547       | 3.5301      | 0.00041534  |
| AR{3}     | 0.046239   | 0.022355       | 2.0684      | 0.038606    |
| AR{4}     | 0.061613   | 0.022318       | 2.7607      | 0.0057672   |
| AR{5}     | 0.088834   | 0.022391       | 3.9673      | 7.2685e-05  |
| AR{6}     | 0.083907   | 0.022364       | 3.7518      | 0.00017556  |
| AR{7}     | 0.03427    | 0.021779       | 1.5735      | 0.1156      |
| AR{8}     | -0.0081881 | 0.021772       | -0.37608    | 0.70686     |
| Variance  | 0.0027967  | 8.8924e-05     | 31.4502     | 4.1766e-217 |

**Table 9.2. Goodness of Fit**

|     |            |
|-----|------------|
| AIC | -6333.5761 |
| BIC | -6277.17   |

## 9.2. Residual Quantile-Quantile plot

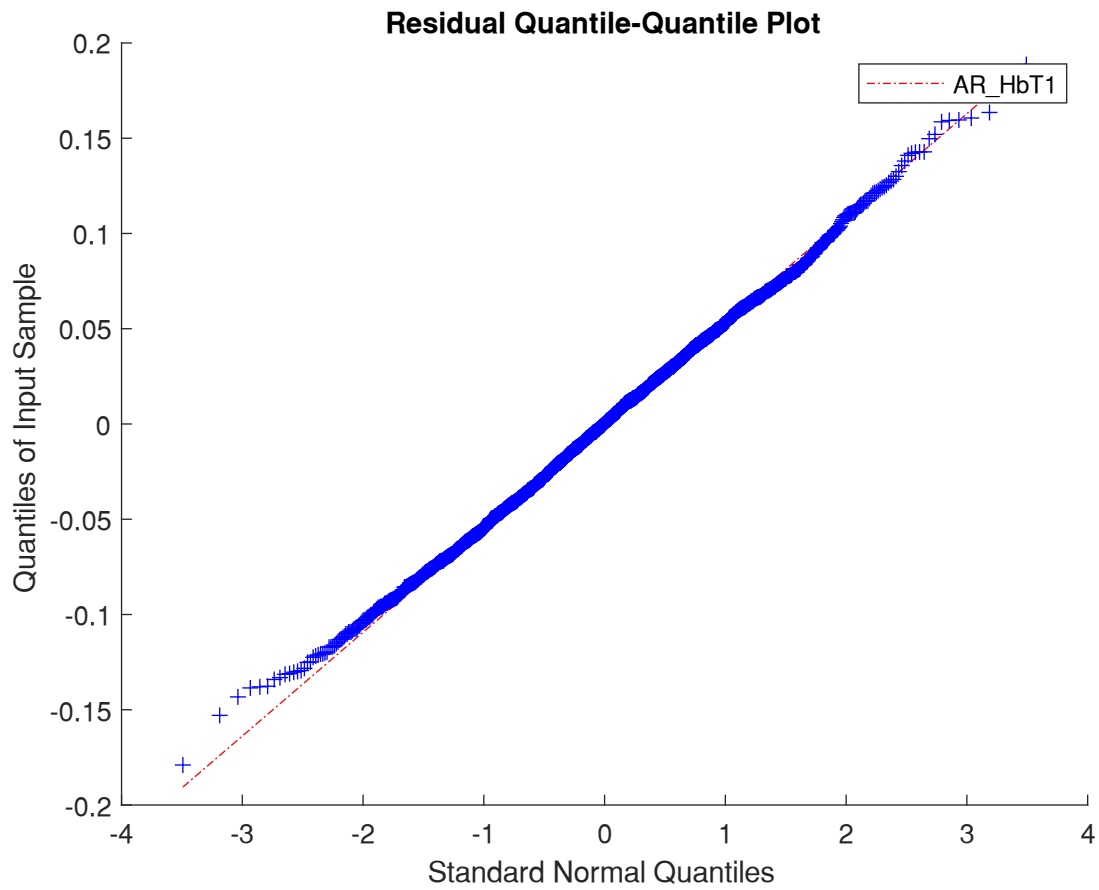

Figure 9.1. Quantile-quantile plot of the residuals of model AR\_HbT1.

### 9.3. Residual Sample Autocorrelation Function

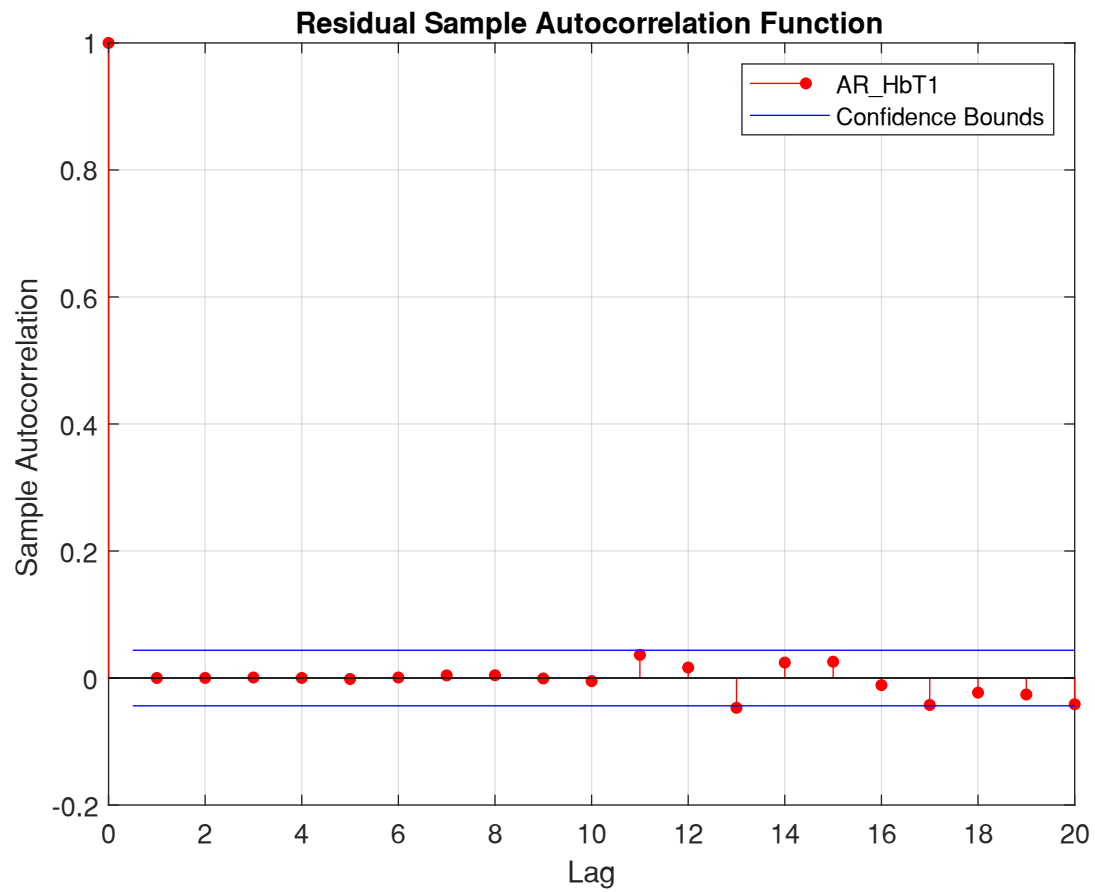

Figure 9.2. Sample autocorrelation function of the residuals of AR\_HbT1

#### 9.4. Ljung-Box Q-Test

Null Hypothesis: The first  $m$  autocorrelations of the residuals of AR\_HbT1 are jointly 0

$$H_0 : \rho_1 = \rho_2 = \dots = \rho_m = 0$$

$$H_a : \rho_j \neq 0, j \in 1, \dots, m$$

**Table 9.3. Test Parameters**

|   | Lags | DOF | Significance Level |
|---|------|-----|--------------------|
| 1 | 10   | 10  | 0.025              |

**Table 9.4. Test Results**

|   | Null Rejected | P-Value | Test Statistic | Critical Value |
|---|---------------|---------|----------------|----------------|
| 1 | false         | 1       | 0.13467        | 20.4832        |

## PUPIL DILATION ANALYSIS

### 9.5. Sample Autocorrelation Function

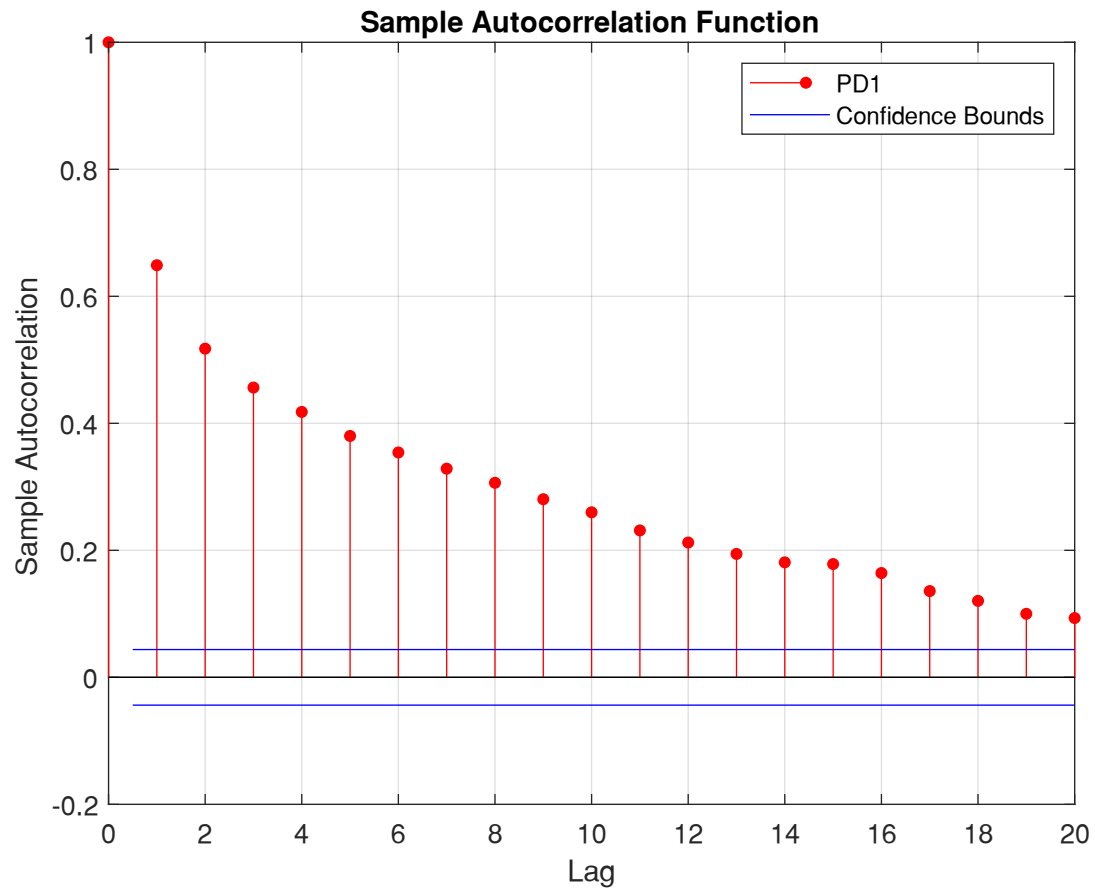

Figure 9.3. Sample autocorrelation function of PD1

## 9.6. Sample Partial Autocorrelation Function

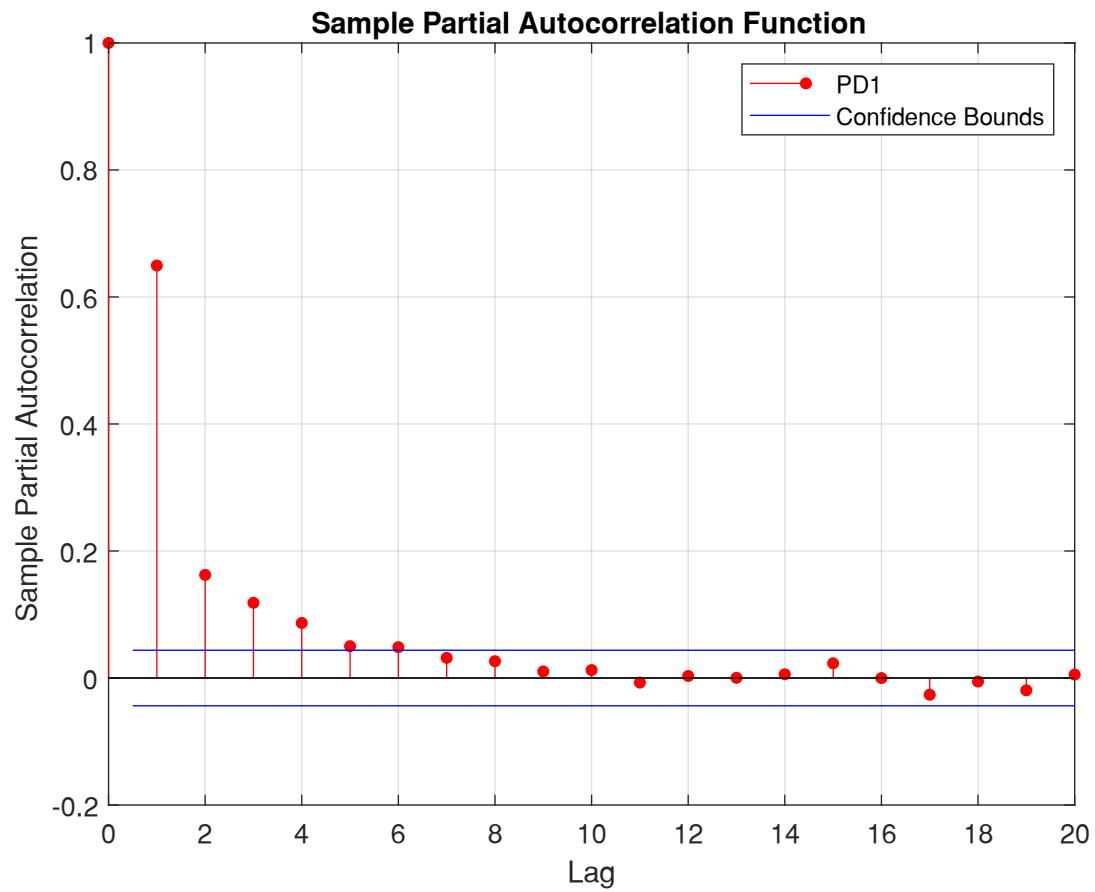

Figure 9.4. Sample partial autocorrelation function of PD1

## 9.7. Augmented Dickey-Fuller Test

Null Hypothesis: PD1 contains a unit root

$$y_t = c + \delta t + \phi y_{t-1} + \beta_1 \Delta y_{t-1} + \dots + \beta_p \Delta y_{t-p} + \varepsilon_t$$

$$H_0 : \phi = 1$$

$$H_a : \phi < 1$$

**Table 9.5. Test Parameters**

|   | Lags | Model | Test Statistic | Significance Level |
|---|------|-------|----------------|--------------------|
| 1 | 0    | AR    | t1             | 0.025              |
| 2 | 1    | AR    | t1             | 0.025              |

**Table 9.6. Test Results**

|   | Null Rejected | P-Value   | Test Statistic | Critical Value |
|---|---------------|-----------|----------------|----------------|
| 1 | true          | 0.0049631 | -2.8071        | -2.2297        |
| 2 | false         | 0.035388  | -2.0894        | -2.2297        |

## 10.ARIMA(7,0,0) Model (Gaussian Distribution) (AR\_PD1)

Autoregressive model of time series PD1 with the following equation:

$$(1 - \phi_1 L - \dots - \phi_7 L^7) y_t = c + \varepsilon_t$$

### 10.1. Model Estimation

**Table 10.1. Estimation Results**

| Parameter | Value     | Standard Error | t Statistic | P-Value    |
|-----------|-----------|----------------|-------------|------------|
| Constant  | 0.14592   | 0.015835       | 9.2153      | 3.1031e-20 |
| AR{1}     | 0.50915   | 0.0115         | 44.2736     | 0          |
| AR{2}     | 0.080443  | 0.016879       | 4.7657      | 1.882e-06  |
| AR{3}     | 0.06344   | 0.023377       | 2.7137      | 0.0066529  |
| AR{4}     | 0.055222  | 0.026223       | 2.1059      | 0.035216   |
| AR{5}     | 0.022734  | 0.030886       | 0.73605     | 0.4617     |
| AR{6}     | 0.033137  | 0.03801        | 0.8718      | 0.38332    |
| AR{7}     | 0.032287  | 0.030999       | 1.0416      | 0.29762    |
| Variance  | 0.0063596 | 8.9936e-05     | 70.7127     | 0          |

**Table 10.2. Goodness of Fit**

|     |            |
|-----|------------|
| AIC | -4619.3801 |
| BIC | -4568.6103 |



## 10.2. Residual Quantile-Quantile plot

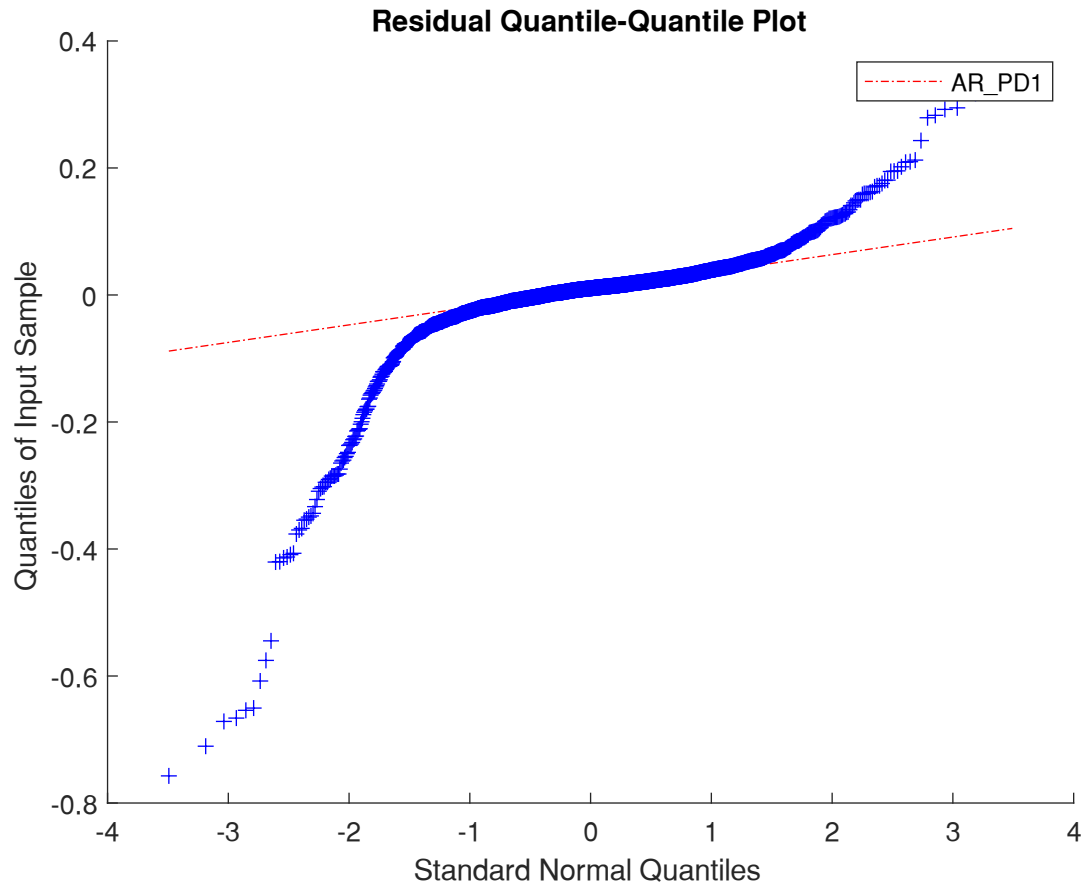

Figure 10.1. Quantile-quantile plot of the residuals of model AR\_PD1.

### 10.3. Residual Sample Autocorrelation Function

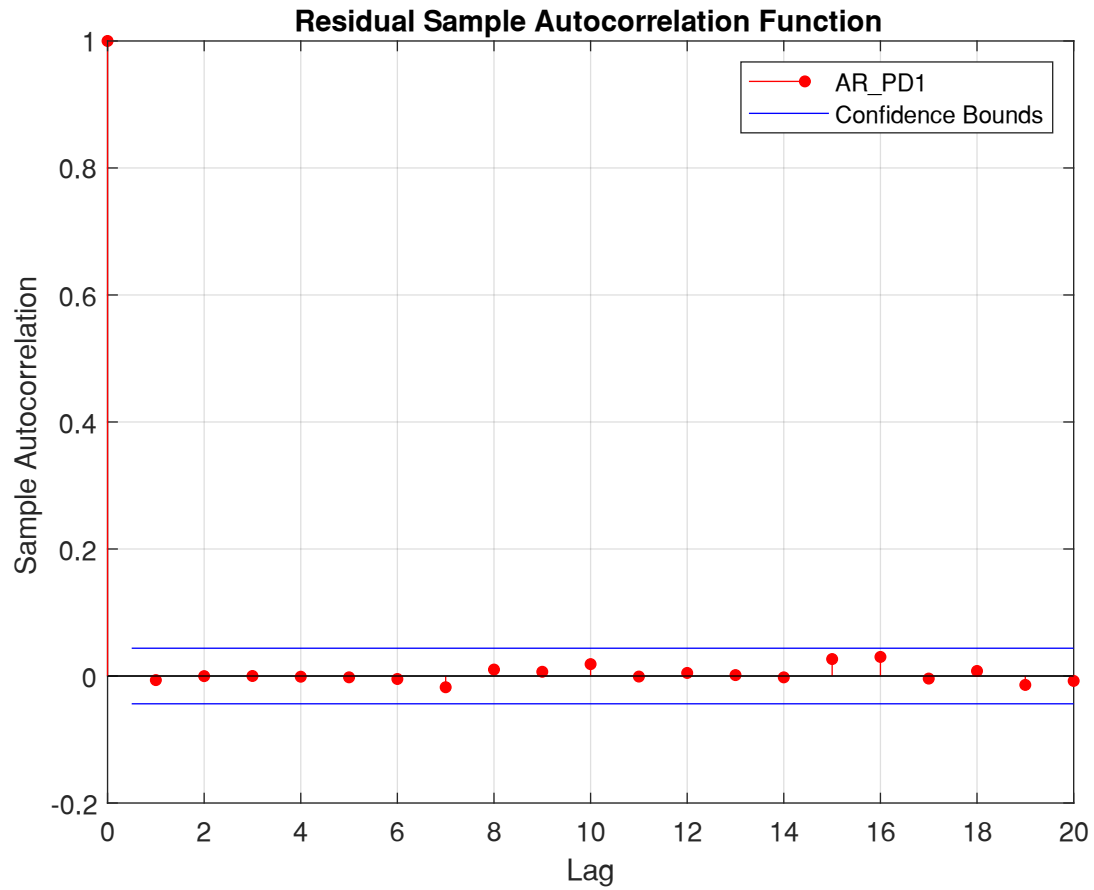

Figure 10.2. Sample autocorrelation function of the residuals of AR\_PD1

## 10.4. Ljung-Box Q-Test

Null Hypothesis: The first  $m$  autocorrelations of the residuals of AR\_PD1 are jointly 0

$$H_0 : \rho_1 = \rho_2 = \dots = \rho_m = 0$$

$$H_a : \rho_j \neq 0, j \in 1, \dots, m$$

**Table 10.3. Test Parameters**

|   | Lags | DOF | Significance Level |
|---|------|-----|--------------------|
| 1 | 10   | 10  | 0.025              |

**Table 10.4. Test Results**

|   | Null Rejected | P-Value | Test Statistic | Critical Value |
|---|---------------|---------|----------------|----------------|
| 1 | false         | 0.9974  | 1.8447         | 20.4832        |

## 3. GCTest 'blockwise'

| H0                                        | Decision    | Distribution | Statistic | PValue     | CriticalValue |
|-------------------------------------------|-------------|--------------|-----------|------------|---------------|
| "Exclude lagged tDCS in HbT,PD equations" | "Reject H0" | "F(38,2001)" | 2.2517    | 2.1601e-05 | 1.4109        |
| H0                                        | Decision    | Distribution | Statistic | PValue     | CriticalValue |
| "Exclude lagged tDCS in HbT equations"    | "Reject H0" | "F(19,2001)" | 1.7127    | 0.028037   | 1.5917        |
| H0                                        | Decision    | Distribution | Statistic | PValue     | CriticalValue |
| "Exclude lagged tDCS in PD equations"     | "Reject H0" | "F(19,2001)" | 2.7897    | 5.4982e-05 | 1.5917        |
