# Supplementary material for: Human-in-the-Loop Optimization of Transcranial Electrical Stimulation at the Point of Care: A Computational Perspective
Source: MDPI journal article supplement (doi:10.3390/brainsci12101294), 2022-09-26
Supplement: s1 [file s1]

## **Supplementary Materials: Modal analysis of the physiologically detailed neurovascular model**

Table S1: Natural frequencies in the physiological frequency range of 0.01-0.2 Hz obtained from the modal analysis of the four physiologically detailed tES perturbation pathways

| Pathways in columns and different runs with different seeds for the bandpass filtered white noise input in the rows | Pathway 1                      | Pathway 2                      | Pathway 3                      | Pathway 4              |
|---------------------------------------------------------------------------------------------------------------------|--------------------------------|--------------------------------|--------------------------------|------------------------|
| Run 1                                                                                                               | 0.0000, 0.0193                 | 0.0247                         | 0.0052, 0.0157, 0.0265         | 0.0000, 0.0069, 0.0201 |
| Run 2                                                                                                               | 0.0189, 0.0201                 | 0.0003, 0.0156, 0.0167         | 0.0025, 0.0231, 0.0235         | 0.0128, 0.0141,        |
| Run 3                                                                                                               | 0.0000, 0.0153, 0.0195         | 0.0109, 0.0191, 0.0288, 0.0476 | 0.0027, 0.0081, 0.0196, 0.0236 | 0.0067, 0.0090, 0.0144 |
| Run 4                                                                                                               | 0.0115, 0.0245                 | NaN                            | 0.0050                         | 0.0020, 0.0168         |
| Run 5                                                                                                               | 0.0007, 0.0077, 0.0200, 0.0276 | 0.0131                         | 0.0005, 0.0128, 0.0176         | 0.0192, 0.0318         |
| Run 6                                                                                                               | 0.0179, 0.0363                 | 0.0237, 0.0418                 | 0.0055                         | 0.0104, 0.0171         |
| Run 7                                                                                                               | 0.0107, 0.0131                 | 0.0128, 0.0200, 0.0380, 0.0659 | 0.0036<br>0.0386               | 0.0381                 |
| Run 8                                                                                                               | 0.0225, 0.0298                 | 0.0048, 0.0100                 | 0.0011, 0.0209                 | 0.0043, 0.0223         |
| Run 9                                                                                                               | 0.0000, 0.0215                 | 0.0038, 0.0285                 | 0.0033, 0.0083, 0.0184         | 0.0099, 0.0164         |
| Run 10                                                                                                              | 0.0198, 0.0319, 0.0360         | 0.0189, 0.0229, 0.0242         | 0.0058,                        | 0.0387                 |

|  |  |  |        |  |
|--|--|--|--------|--|
|  |  |  | 0.0188 |  |
|--|--|--|--------|--|

Table S2: List of the poles damping parameters associated with linearized model for the four tES perturbation pathways

| Pathway | Poles                  | Damping   | Frequency<br>(rad/seconds) | Time constant<br>(seconds) |
|---------|------------------------|-----------|----------------------------|----------------------------|
| 1       | -2.45e-01,             | 1.00e+00, | 2.45e-01,                  | 4.09e+00,                  |
|         | -4.00e-01,             | 1.00e+00, | 4.00e-01,                  | 2.50e+00,                  |
|         | -1.00e+00,             | 1.00e+00, | 1.00e+00,                  | 1.00e+00,                  |
|         | -1.97e+00,             | 1.00e+00, | 1.97e+00,                  | 5.09e-01,                  |
|         | -3.30e+00,             | 1.00e+00, | 3.30e+00,                  | 3.03e-01,                  |
|         | -4.90e+00 + 8.44e+00i, | 5.02e-01, | 9.76e+00,                  | 2.04e-01,                  |
|         | -4.90e+00 - 8.44e+00i, | 5.02e-01, | 9.76e+00,                  | 2.04e-01,                  |
|         | -1.51e+01,             | 1.00e+00, | 1.51e+01,                  | 6.63e-02,                  |
|         | -2.07e+01,             | 1.00e+00, | 2.07e+01,                  | 4.83e-02,                  |
|         | -2.97e+04,             | 1.00e+00, | 2.97e+04,                  | 3.36e-05,                  |
|         | -9.59e+06              | 1.00e+00, | 9.59e+06                   | 1.04e-07                   |
| 2       | -2.45e-01,             | 1.00e+00, | 2.45e-01,                  | 4.09e+00,                  |
|         | -1.00e+00,             | 1.00e+00, | 1.00e+00,                  | 1.00e+00,                  |
|         | -1.97e+00,             | 1.00e+00, | 1.97e+00,                  | 5.09e-01,                  |
|         | -3.30e+00,             | 1.00e+00, | 3.30e+00,                  | 3.03e-01,                  |
|         | -4.90e+00 + 8.44e+00i, | 5.02e-01, | 9.76e+00,                  | 2.04e-01,                  |
|         | -4.90e+00 - 8.44e+00i, | 5.02e-01, | 9.76e+00,                  | 2.04e-01,                  |
|         | -1.51e+01,             | 1.00e+00, | 1.51e+01,                  | 6.63e-02,                  |
|         | -2.07e+01,             | 1.00e+00, | 2.07e+01,                  | 4.83e-02,                  |
|         | -2.97e+04,             | 1.00e+00, | 2.97e+04,                  | 3.36e-05,                  |
|         | -9.59e+06              | 1.00e+00, | 9.59e+06                   | 1.04e-07                   |

|   |                        |           |           |           |
|---|------------------------|-----------|-----------|-----------|
| 3 | -2.45e-01,             | 1.00e+00, | 2.45e-01, | 4.09e+00, |
|   | -1.00e+00,             | 1.00e+00, | 1.00e+00, | 1.00e+00, |
|   | -3.30e+00,             | 1.00e+00, | 3.30e+00, | 3.03e-01, |
|   | -4.90e+00 + 8.44e+00i, | 5.02e-01, | 9.76e+00, | 2.04e-01, |
|   | -4.90e+00 - 8.44e+00i, | 5.02e-01, | 9.76e+00, | 2.04e-01, |
|   | -2.07e+01,             | 1.00e+00, | 2.07e+01, | 4.83e-02, |
|   | -2.97e+04,             | 1.00e+00, | 2.97e+04, | 3.36e-05, |
|   | -9.59e+06              | 1.00e+00, | 9.59e+06  | 1.04e-07  |
| 4 | -2.45e-01,             | 1.00e+00, | 2.45e-01, | 4.09e+00, |
|   | -3.30e+00,             | 1.00e+00, | 3.30e+00, | 3.03e-01, |
|   | -4.90e+00 + 8.44e+00i, | 5.02e-01, | 9.76e+00, | 2.04e-01, |
|   | -4.90e+00 - 8.44e+00i, | 5.02e-01, | 9.76e+00, | 2.04e-01, |
|   | -2.07e+01,             | 1.00e+00, | 2.07e+01, | 4.83e-02, |
|   | -9.59e+06              | 1.00e+00, | 9.59e+06  | 1.04e-07  |
