# Supplementary material for: Human-in-the-Loop Optimization of Transcranial Electrical Stimulation at the Point of Care: A Computational Perspective
Source: Brain Sci. 2022 Sep 26;12(10):1294. doi: 10.3390/brainsci12101294 (PMC9599464; doi:10.3390/brainsci12101294)
Supplement: Supplementary file 1 [file brainsci-12-01294-s001.zip]

Archive with 5 entries (5 files):
- brainsci-1876073-supplementary-BrainSciencesFinal-suppl09252022-A.pdf
- brainsci-1876073-supplementary-BrainSciencesFinal-suppl09252022-B.pdf
- brainsci-1876073-supplementary-BrainSciencesFinal-suppl09252022-C.pdf
- brainsci-1876073-supplementary-BrainSciencesFinal-suppl09252022-D.pdf
- brainsci-1876073-supplementary-BrainSciencesFinal-suppl09252022-processedData.pdf
